# Supplementary material
Source: PubMed Central journal article supplement (PMC5773101)
Supplement: NIHMS929972-supplement-Combined_Supplementry.pdf [file NIHMS929972-supplement-Combined_Supplementry.pdf]

# Supplementary Materials for

## Metabolic Differentiation of Early Lyme Disease from Southern Tick-Associated Rash Illness (STARI)

Claudia R. Molins, Laura V. Ashton, Gary P. Wormser, Barbara G. Andre, Ann M. Hess, Mark J. Delorey, Mark A. Pilgard, Barbara J. Johnson, Kristofer Webb, M. Nurul Islam, Adoracion Pegalajar-Jurado, Irida Molla<sup>3</sup>, Mollie W. Jewett, John T. Belisle<sup>†</sup>

<sup>†</sup>Corresponding author e-mail: John.Belisle@colostate.edu

### The pdf file includes:

- Fig. S1. Level 1 identification of stearoyl ethanolamide.
- Fig. S2. Level 1 identification of pentadecanoyl ethanolamide.
- Fig. S3. Level 1 identification of eicosanoyl ethanolamide.
- Fig S4. Level 1 identification of glycerophospho-*N*-palmitoyl ethanolamine.
- Fig. S5. Level 1 identification of stearamide.
- Fig. S6. Level 1 identification of erucamide.
- Fig. S7. Level 1 identification of L-phenylalanine.
- Fig. S8. Level 1 identification of nonanedioic acid.
- Fig. S9. Level 1 identification of glycocholic acid.
- Fig. S10. Level 1 identification of 3-carboxy-4-methyl-5-propyl-2-furanpropanoic acid (CMPF).
- Fig S11. Level 2 identification of Lyso PA (20:4) by MS/MS spectral matching.
- Fig. S12. Level 2 identification of 3-ketosphingosine by MS/MS spectral matching.
- Table S1. Serum samples used in this study.
- Table S2. 261 MF biosignature list.
- Table S3. MetaboAnalyst results.
- Table S4. Regression coefficients ( $\beta$ ) of the LASSO two-way statistical model.
- Table S5. LASSO and RF two-way model classification probability scores.
- Table S6. Regression coefficients ( $\beta$ ) of the LASSO three-way statistical model.
- Table S7. LASSO and RF three-way model classification probability scores.
- Table S8. ANOVA results on Lasso and Random Forest scores with sample source as the explanatory variable.
- Table S9. Grouping indicated by the ANOVA results

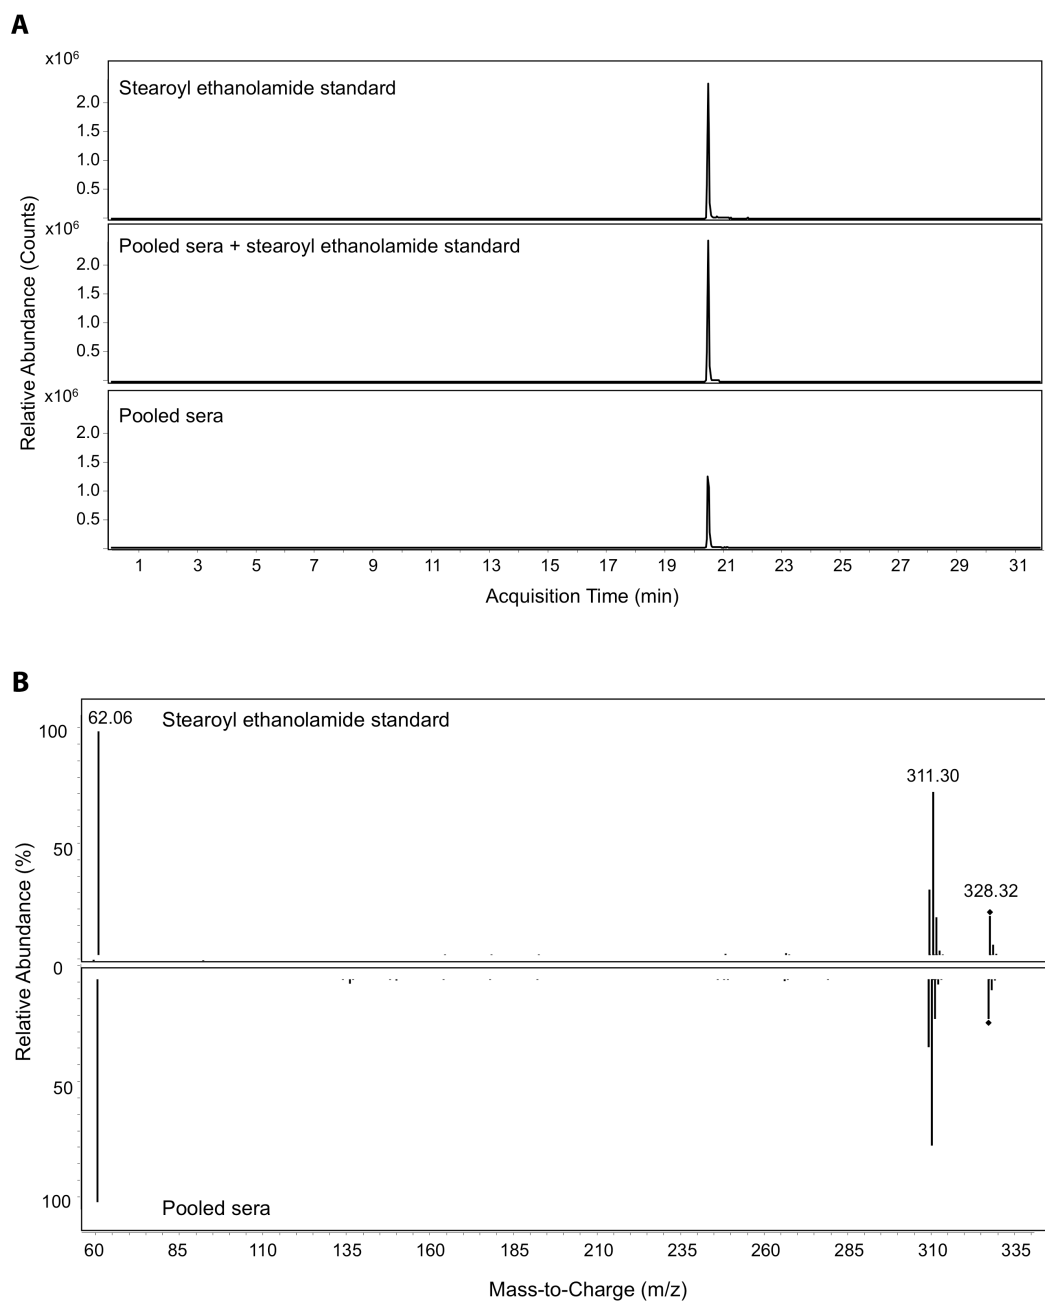

**Fig. S1. Level 1 identification of stearoyl ethanolamide.** Confirmation of the structural identity of stearoyl ethanolamide was achieved by retention-time alignment (**A**) of authentic standard (top panel), authentic standard spiked in pooled patient sera (middle panel), and the targeted metabolite in pooled patient sera; and by comparison of MS/MS spectra (**B**) of the authentic standard (top) and the targeted metabolite in pooled patient sera (bottom). Retention-time alignments for stearoyl ethanolamide (**A**) were generated with extracted ion chromatograms for m/z 328.3204. MS/MS spectra for stearoyl ethanolamide were obtained with a collision energy of 20 eV.

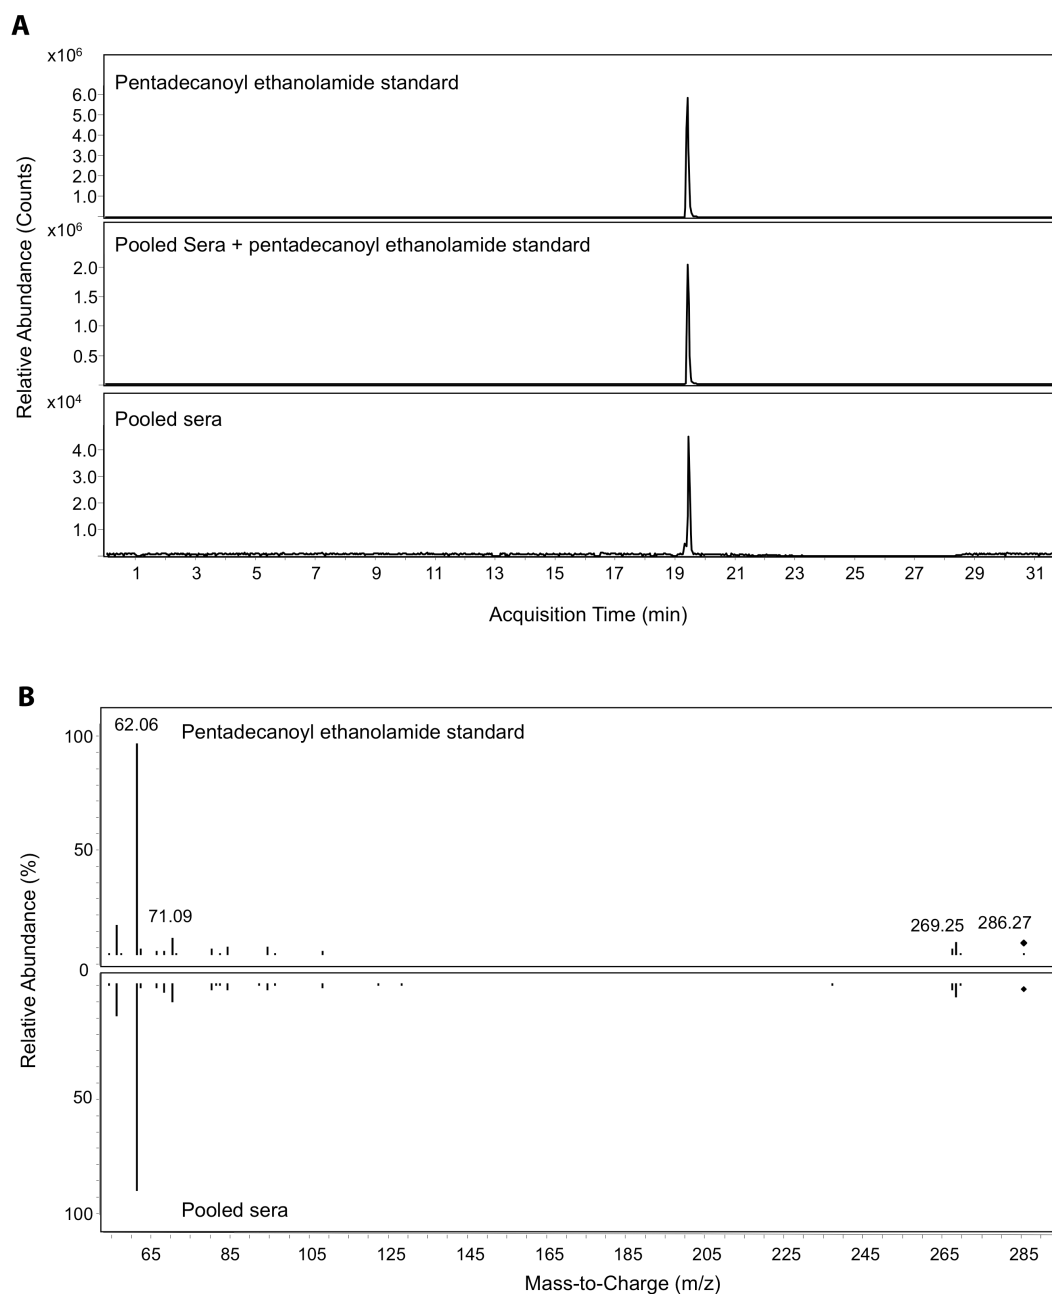

**Fig. S2. Level 1 identification of pentadecanoyl ethanolamide.** Confirmation of the structural identity of pentadecanoyl ethanolamide was achieved by retention-time alignment (**A**) of authentic standard (top panel), authentic standard spiked in pooled patient sera (middle panel), and the targeted metabolite in pooled patient sera; and by comparison of MS/MS spectra (**B**) of the authentic standard (top) and the targeted metabolite in pooled patient sera (bottom). Retention-time alignments for pentadecanoyl ethanolamide (**A**) were generated with extracted ion chromatograms for  $m/z$  286.2737. MS/MS spectra for pentadecanoyl ethanolamide were obtained with a collision energy of 20 eV.

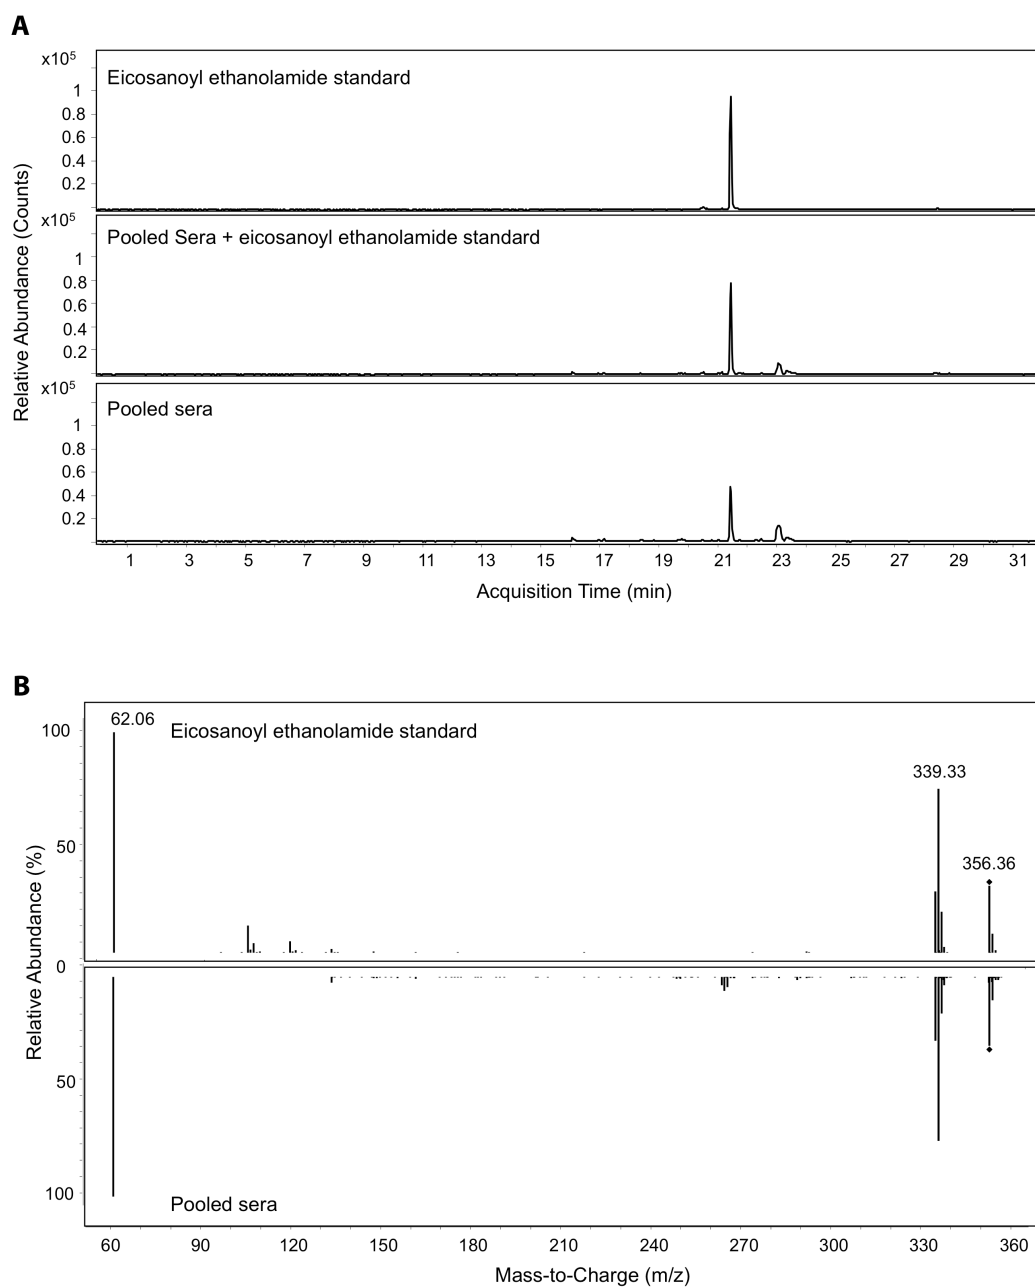

**Fig. S3. Level 1 identification of eicosanoyl ethanolamide.** Confirmation of the structural identity of eicosanoyl ethanolamide was achieved by retention-time alignment (**A**) of authentic standard (top panel), authentic standard spiked in pooled patient sera (middle panel), and the targeted metabolite in pooled patient sera; and by comparison of MS/MS spectra (**B**) of the authentic standard (top) and the targeted metabolite in pooled patient sera (bottom). Retention-time alignments for eicosanoyl ethanolamide (**A**) were generated with extracted ion chromatograms for m/z 356.3517. MS/MS spectra for eicosanoyl ethanolamide were obtained with a collision energy of 20 eV.

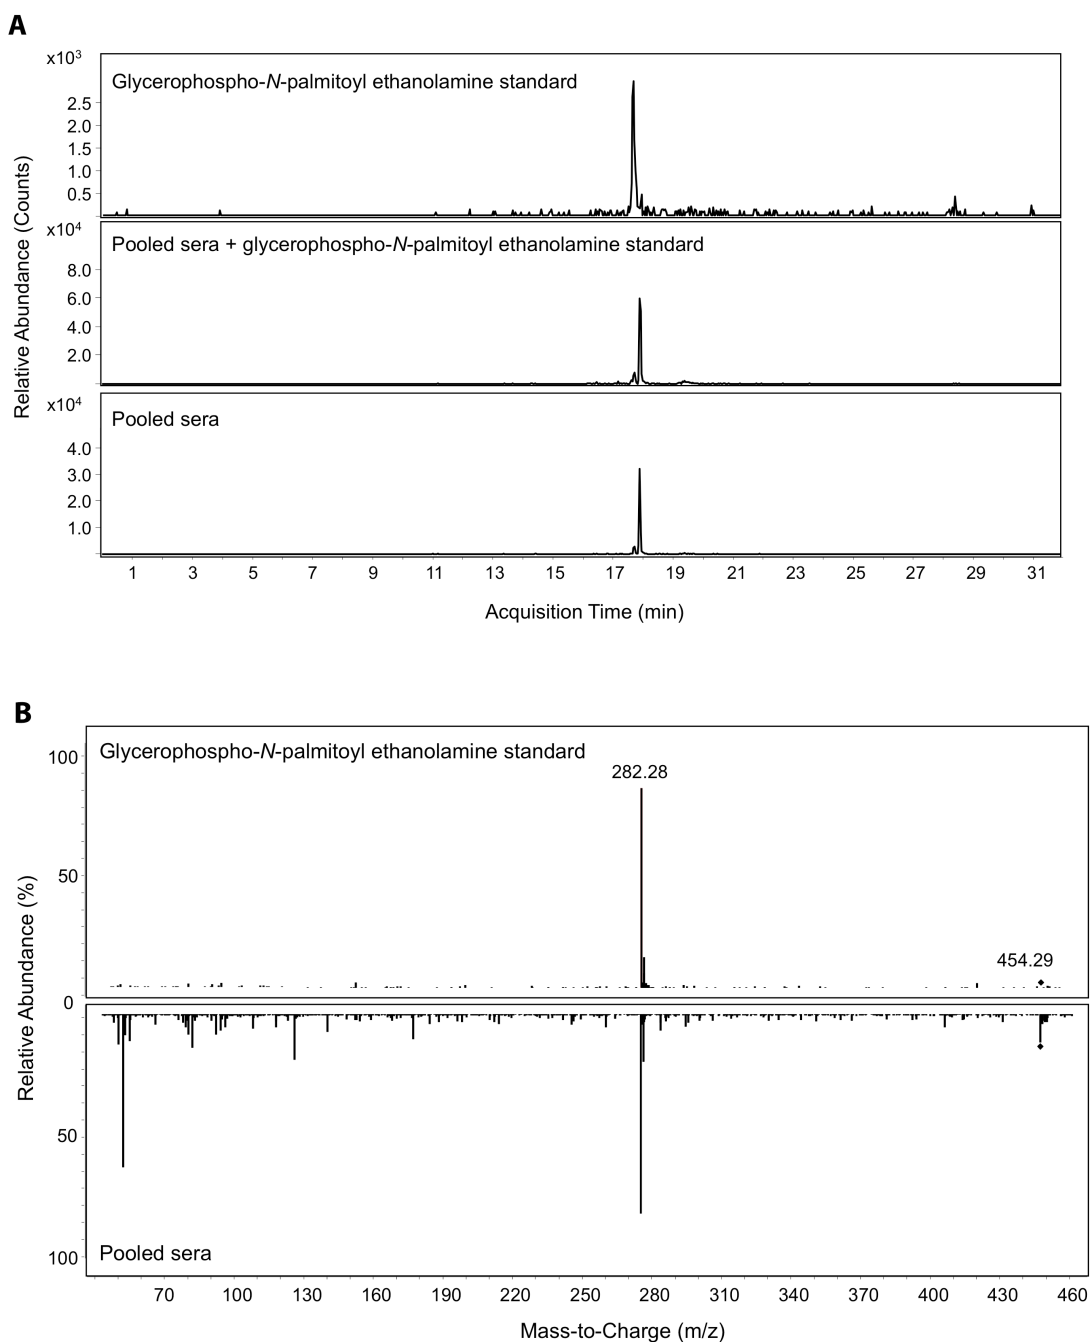

**Fig. S4. Level 1 identification of glycerophospho-*N*-palmitoyl ethanolamine.** Confirmation of the structural identity of glycerophospho-*N*-palmitoyl ethanolamine was achieved by retention-time alignment (**A**) of authentic standard (top panel), authentic standard spiked in pooled patient sera (middle panel), and the targeted metabolite in pooled patient sera; and by comparison of MS/MS spectra (**B**) of the authentic standard (top) and the targeted metabolite in pooled patient sera (bottom). Retention-time alignments for glycerophospho-*N*-palmitoyl ethanolamine (**A**) were generated with extracted ion chromatograms for  $m/z$  454.2923. MS/MS spectra for glycerophospho-*N*-palmitoyl ethanolamine were obtained with a collision energy of 20 eV.

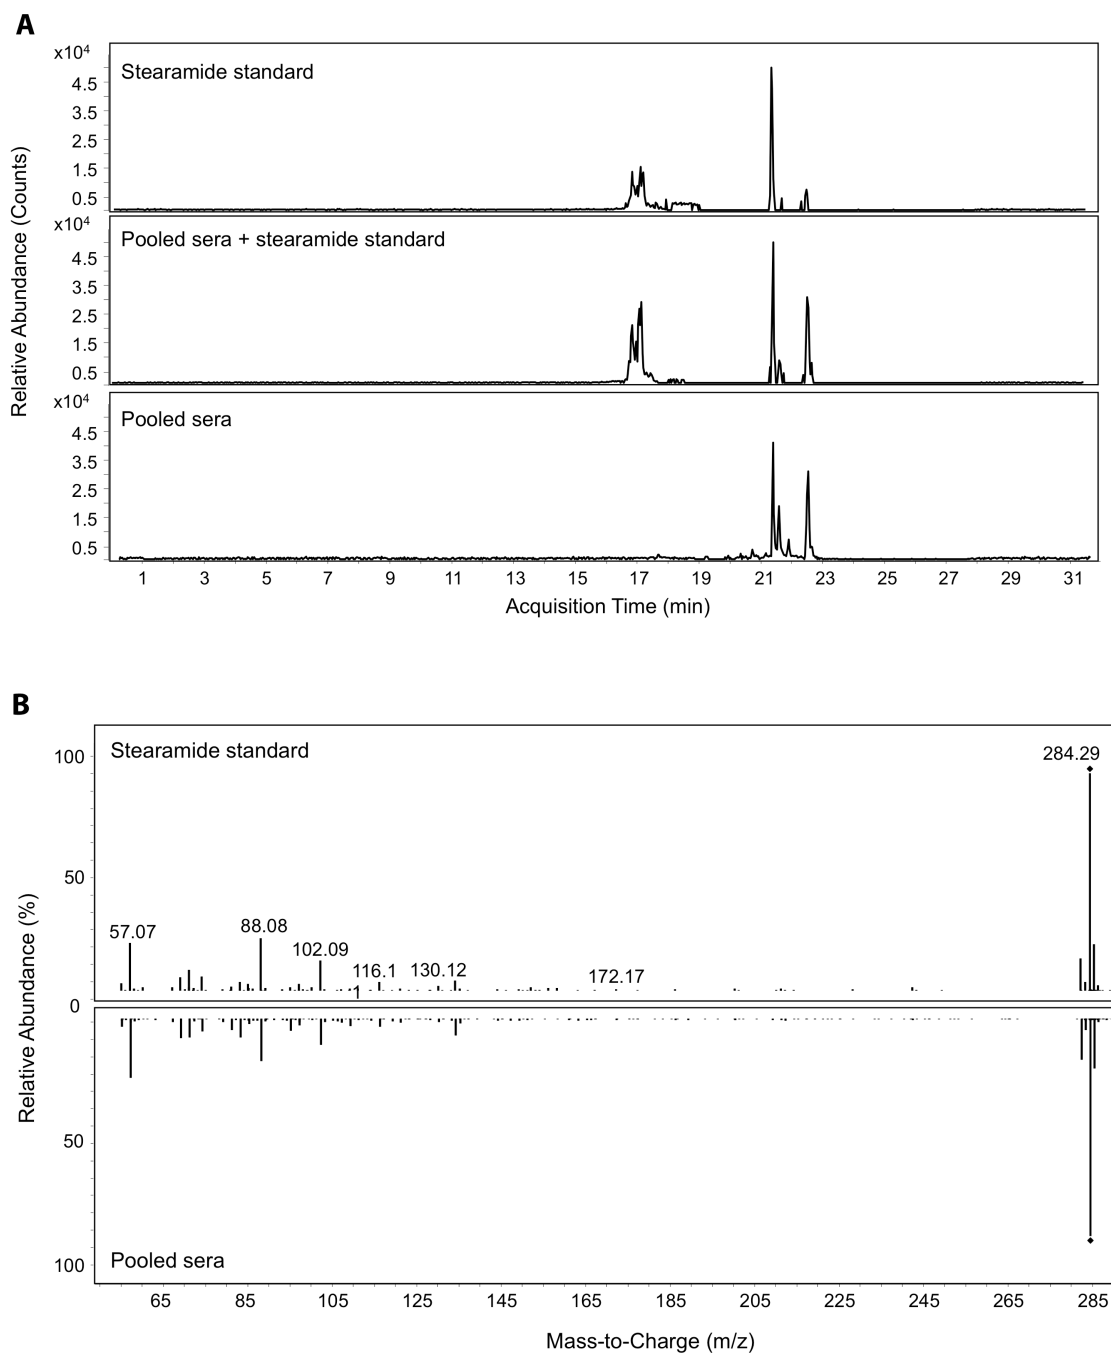

**Fig. S5. Level 1 identification of stearamide.** Confirmation of the structural identity of stearamide was achieved by retention-time alignment (**A**) of authentic standard (top panel), authentic standard spiked in pooled patient sera (middle panel), and the targeted metabolite in pooled patient sera; and by comparison of MS/MS spectra (**B**) of the authentic standard (top) and the targeted metabolite in pooled patient sera (bottom). Retention-time alignments for stearamide (**A**) were generated with extracted ion chromatograms for  $m/z$  284.2943. MS/MS spectra for stearamide were obtained with a collision energy of 20 eV.

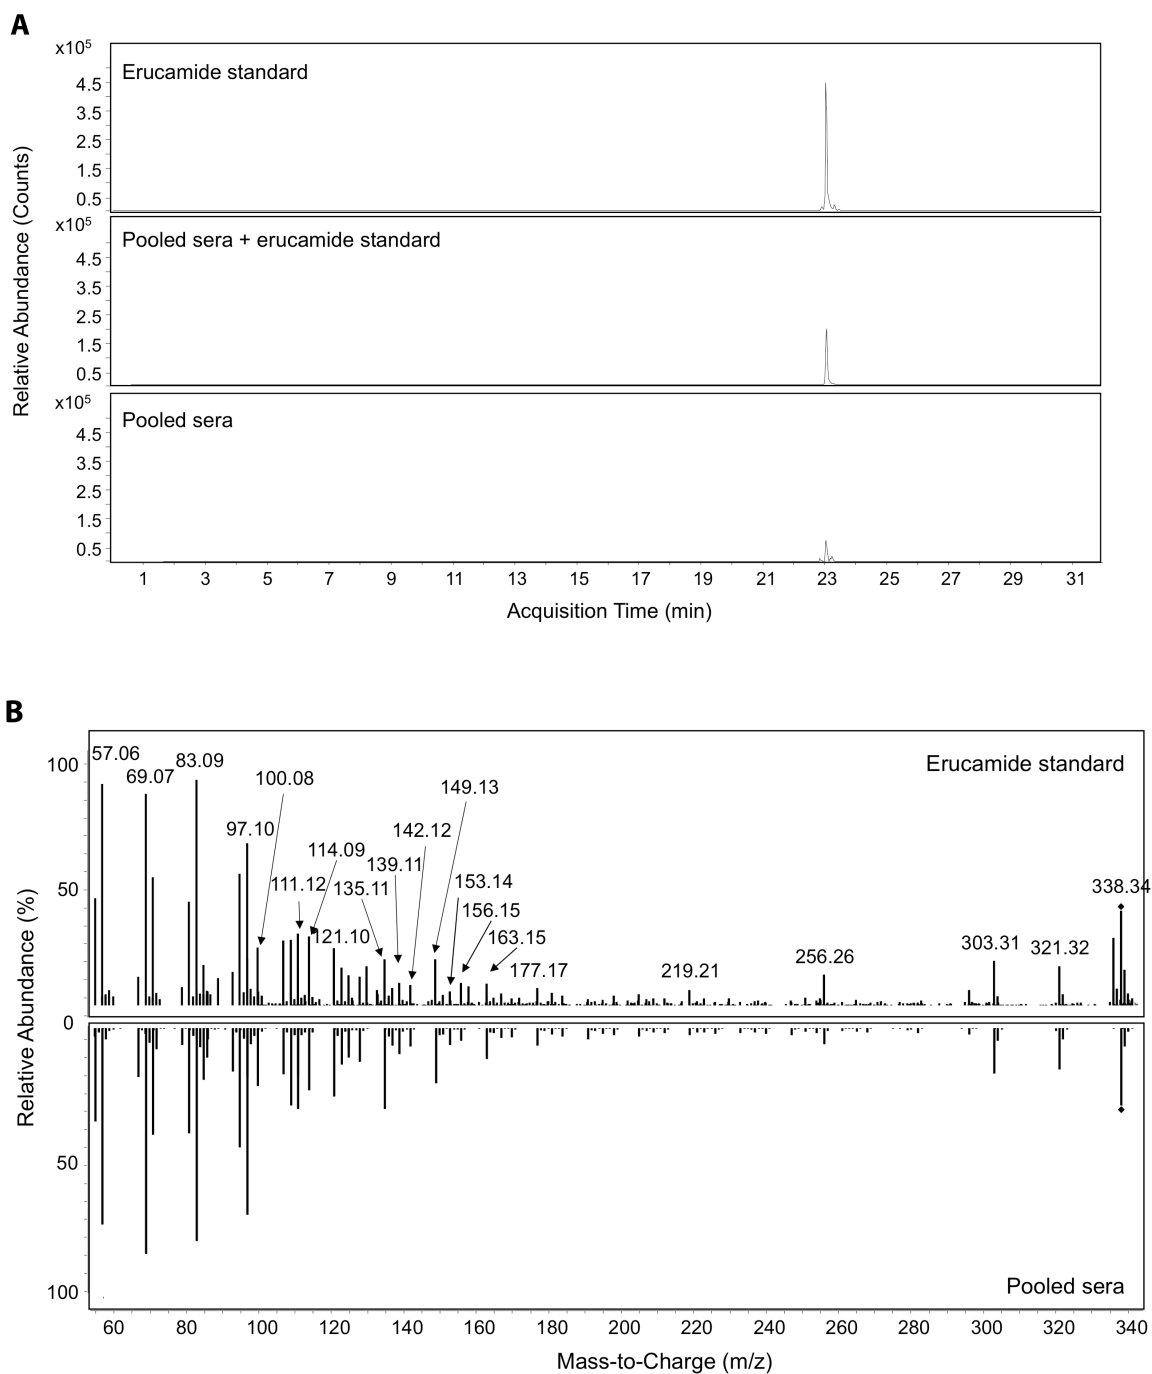

**Fig. S6. Level 1 identification of erucamide.** Confirmation of the structural identity of erucamide was achieved by retention-time alignment (A) of authentic standard (top panel), authentic standard spiked in pooled patient sera (middle panel), and the targeted metabolite in pooled patient sera; and by comparison of MS/MS spectra (B) of the authentic standard (top) and the targeted metabolite in pooled patient sera (bottom). Retention-time alignments for erucamide (A) were generated with extracted ion chromatograms for m/z 338.3430. MS/MS spectra for erucamide were obtained with a collision energy of 20 eV.

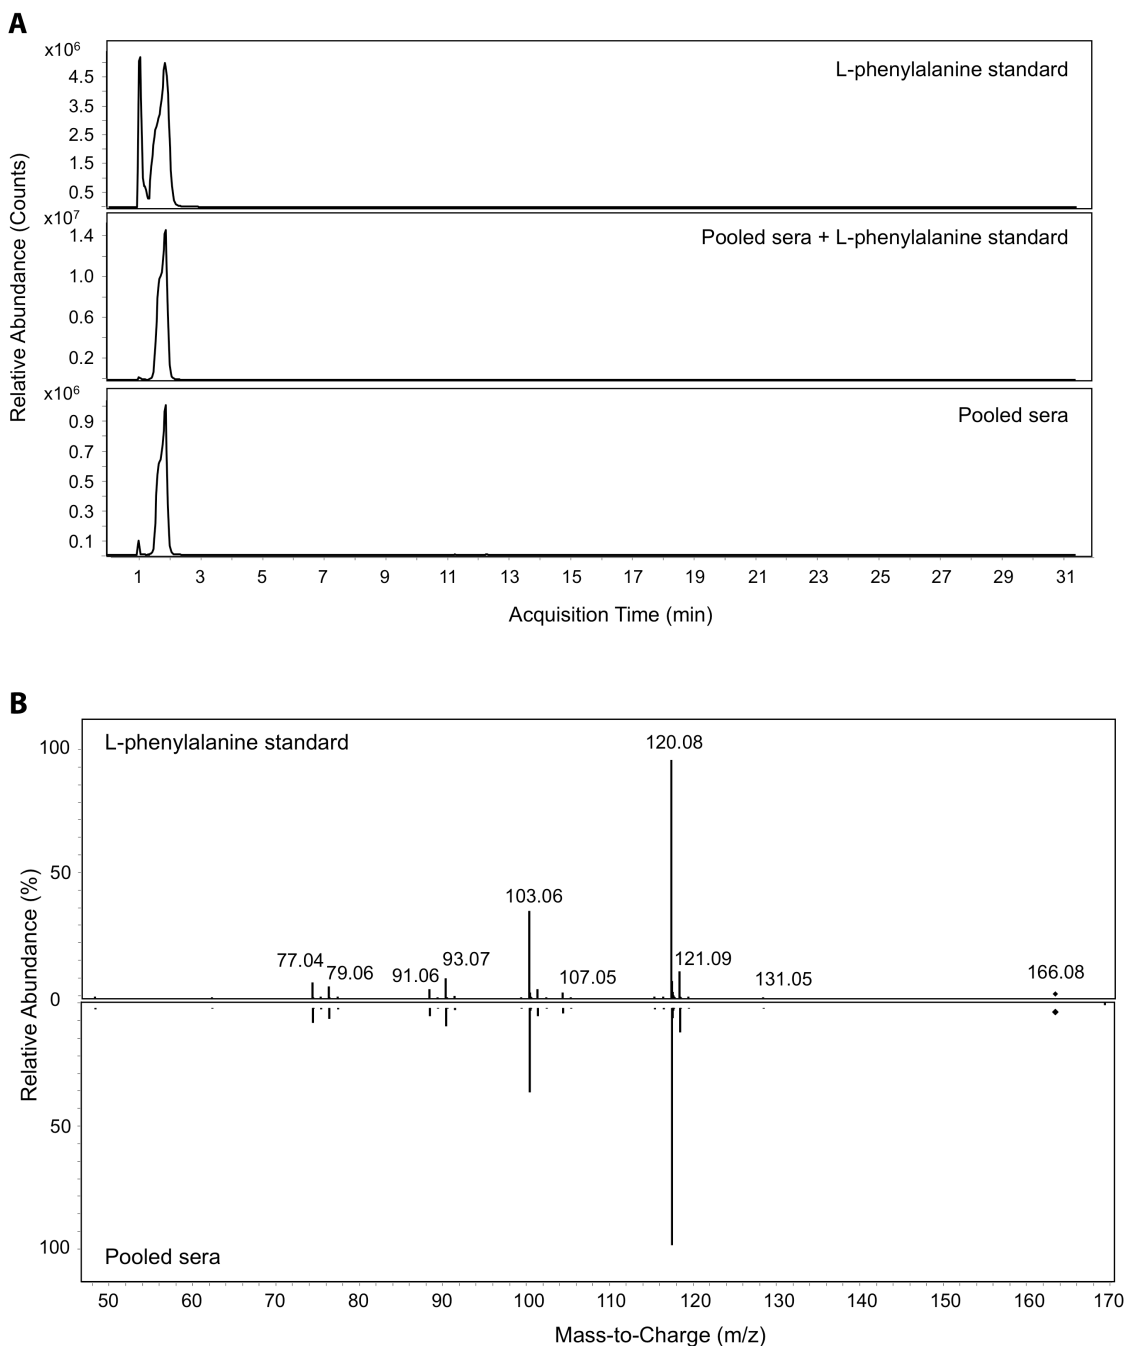

**Fig. S7. Level 1 identification of L-phenylalanine.** Confirmation of the structural identity of L-phenylalanine was achieved by retention-time alignment (A) of authentic standard (top panel), authentic standard spiked in pooled patient sera (middle panel), and the targeted metabolite in pooled patient sera; and by comparison of MS/MS spectra (B) of the authentic standard (top) and the targeted metabolite in pooled patient sera (bottom). Retention-time alignments for L-phenylalanine (A) were generated with extracted ion chromatograms for m/z 166.0852. MS/MS spectra for L-phenylalanine were obtained with a collision energy of 20 eV.



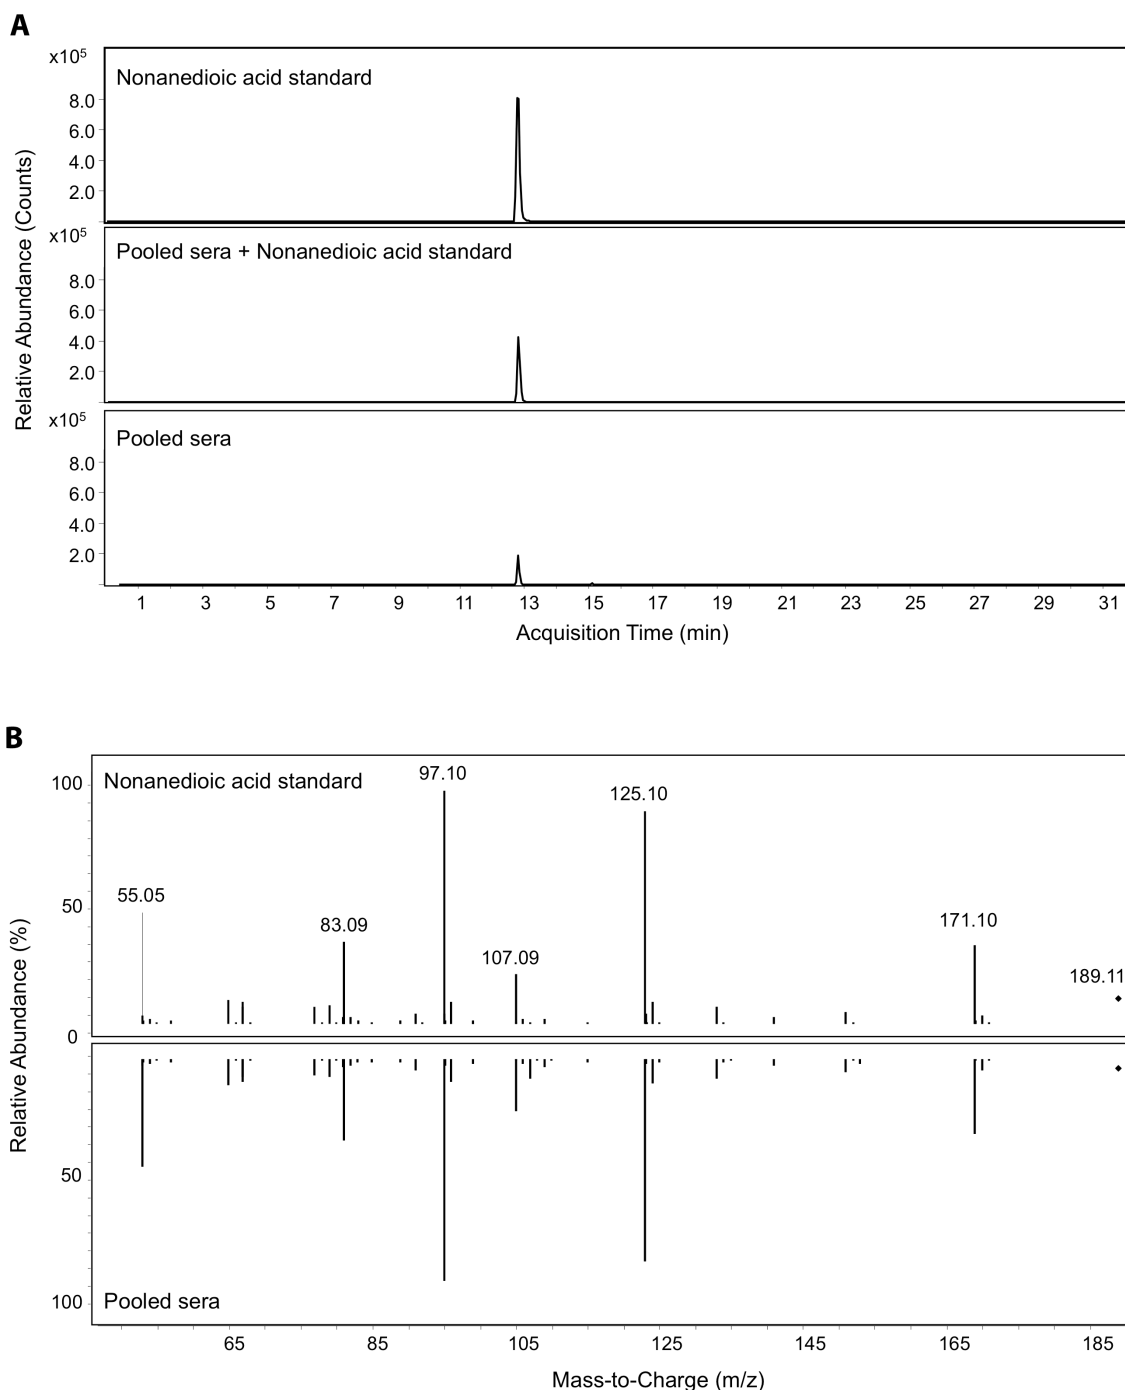

**Fig. S8. Level 1 identification of nonanedioic acid.** Confirmation of the structural identity of nonanedioic acid was achieved by retention-time alignment (**A**) of authentic standard (top panel), authentic standard spiked in pooled patient sera (middle panel), and the targeted metabolite in pooled patient sera; and by comparison of MS/MS spectra (**B**) of the authentic standard (top) and the targeted metabolite in pooled patient sera (bottom). Retention-time alignments for nonanedioic acid (**A**) were generated with extracted ion chromatograms for  $m/z$  189.1122. MS/MS spectra for nonanedioic acid were obtained with a collision energy of 10 eV.

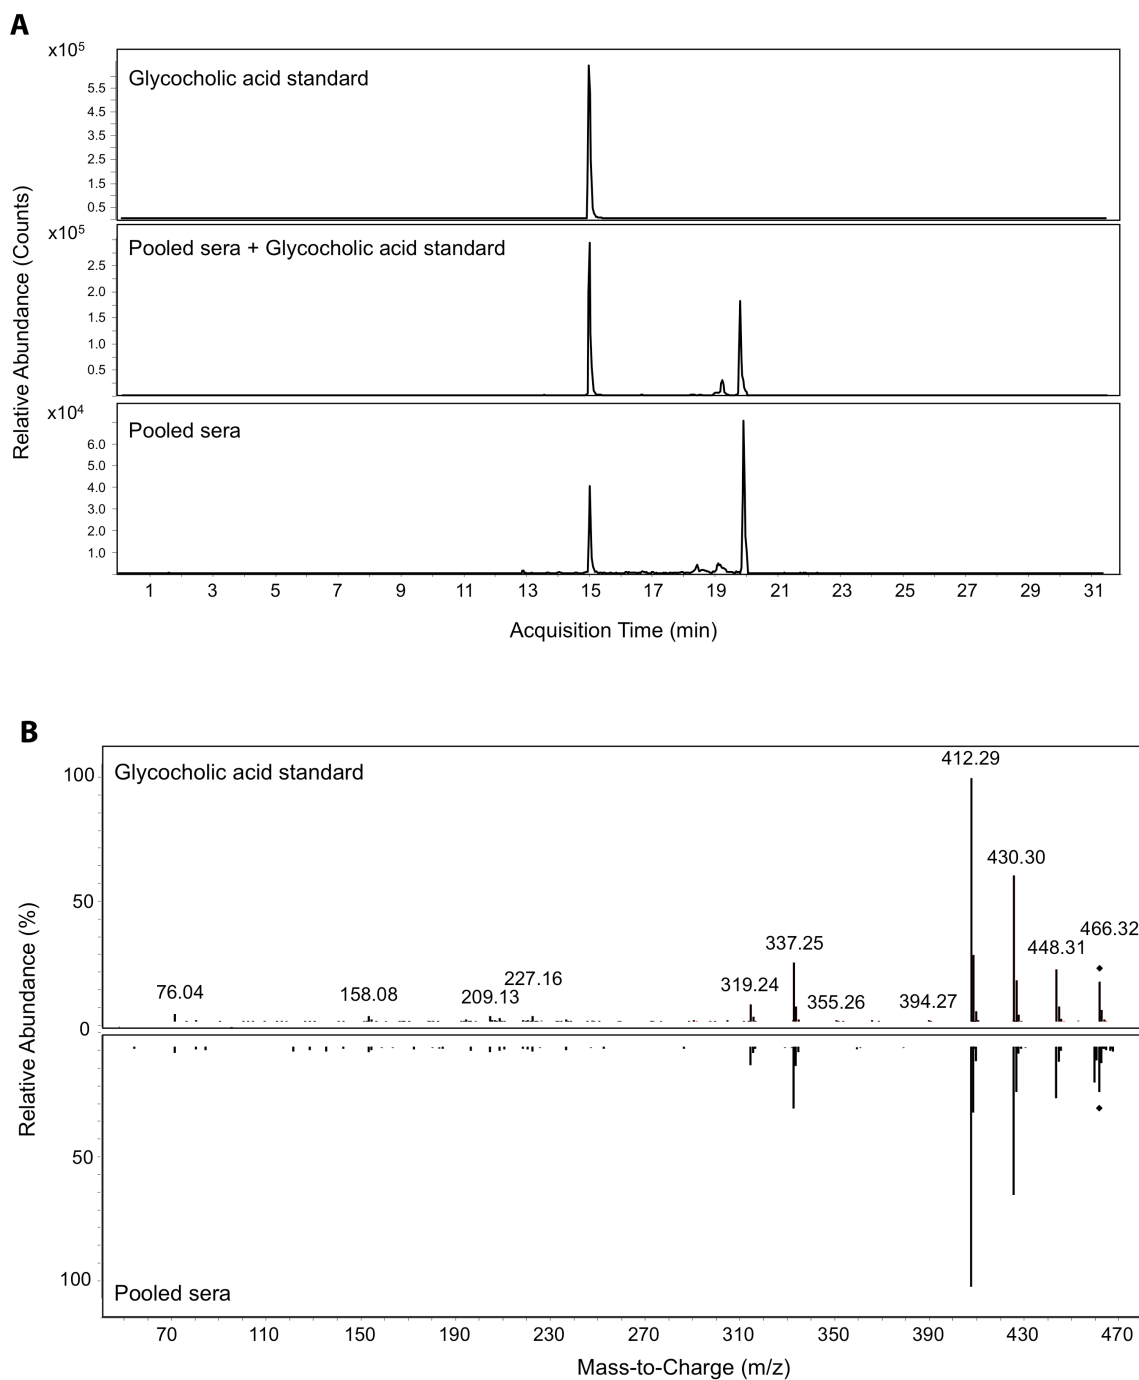

**Fig. S9. Level 1 identification of glycocholic acid.** Confirmation of the structural identity of glycocholic acid was achieved by retention-time alignment (A) of authentic standard (top panel), authentic standard spiked in pooled patient sera (middle panel), and the targeted metabolite in pooled patient sera; and by comparison of MS/MS spectra (B) of the authentic standard (top) and the targeted metabolite in pooled patient sera (bottom). Retention-time alignments for glycocholic acid (A) were generated with extracted ion chromatograms for  $m/z$  466.3152. MS/MS spectra for glycocholic acid were obtained with a collision energy of 20 eV.

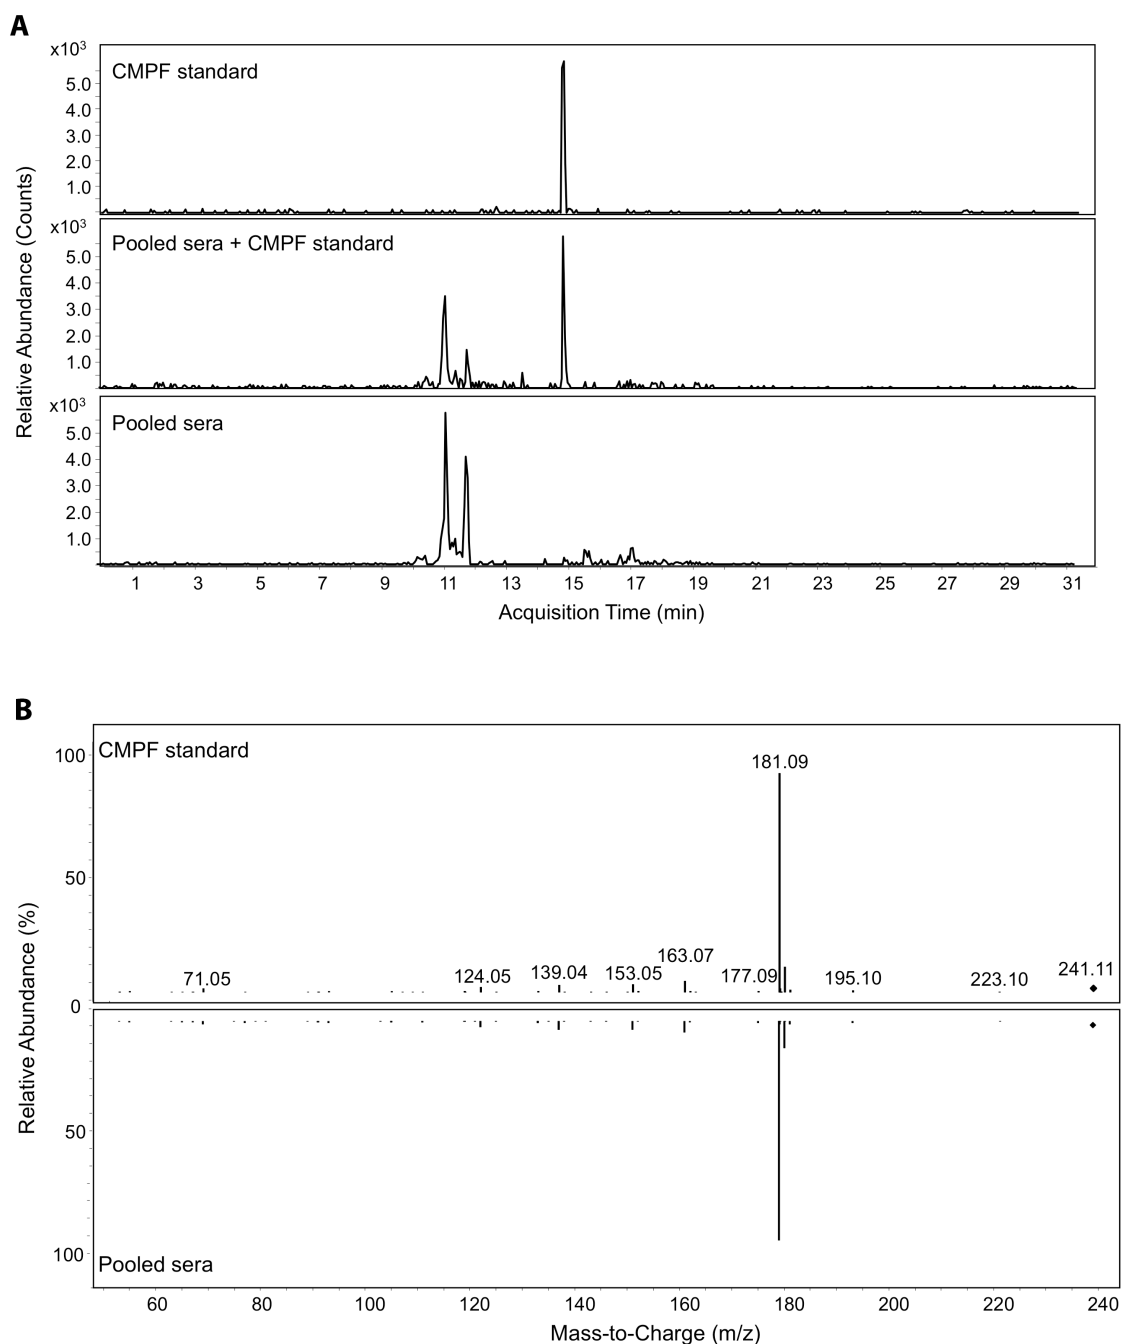

**Fig. S10. Level 1 identification of 3-carboxy-4-methyl-5-propyl-2-furanpropanoic acid (CMPF).** Confirmation of the structural identity of CMPF was achieved by retention-time alignment (**A**) of authentic standard (top panel), authentic standard spiked in pooled patient sera (middle panel), and the targeted metabolite in pooled patient sera; and by comparison of MS/MS spectra (**B**) of the authentic standard (top) and the targeted metabolite in pooled patient sera (bottom). Retention-time alignments for CMPF (**A**) were generated with extracted ion chromatograms for  $m/z$  241.1069. MS/MS spectra for CMPF were obtained with a collision energy of 20 eV.

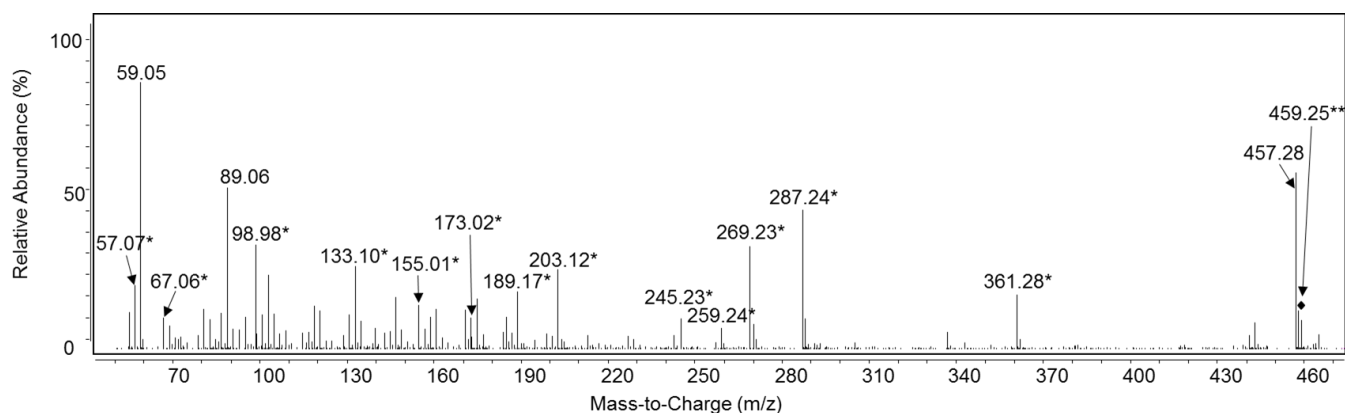

**Fig. S11. Level 2 identification of Lyso PA (20:4) by MS/MS spectral matching.** The MS/MS fragmentation pattern for m/z 459.2502 (\*\*) in pooled sera at RT 19.02 is shown. A match to the fragmentation of arachidonoyl lysophosphatidic acid (Lyso PA (20:4)) in the Metlin database is indicated by (\*). MS/MS spectra for m/z 459.2502 were obtained with a collision energy of 20 eV.

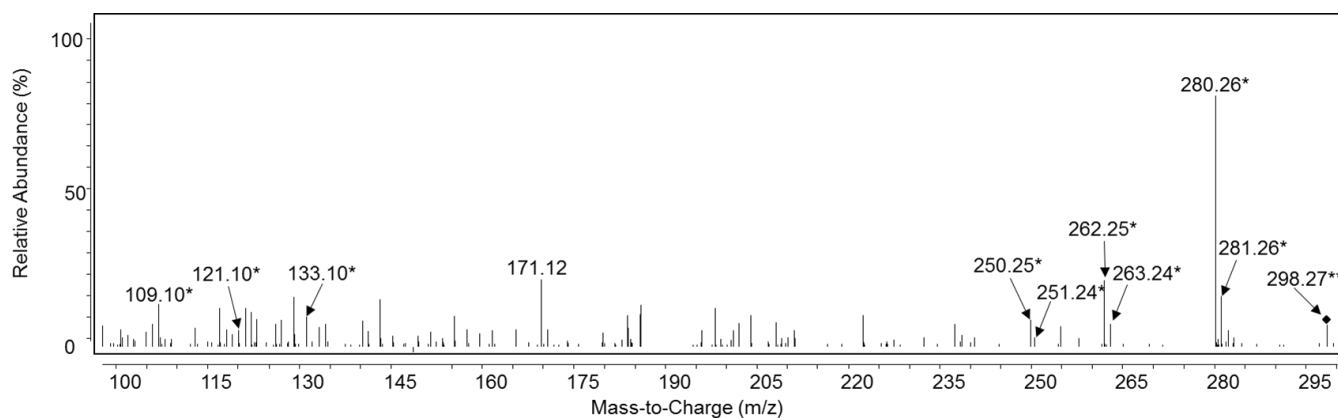

**Fig. S12. Level 2 identification of 3-ketosphingosine by MS/MS spectral matching.** The MS/MS fragmentation pattern for m/z 298.2740 (\*\*) in pooled sera at RT 16.44 is shown. A match to the fragmentation of 3-ketosphingosine in the Metlin database is indicated by (\*). MS/MS spectra for m/z 298.2740 were obtained with a collision energy of 20 eV.

**Table S1. Serum samples used in this study.** NYMC, New York Medical College; CDC, Centers for Disease Control and Prevention; UCF, University of Central Florida

| Description of Samples           | Sample Numbers | Sample Criteria for Inclusion                                                                                                                                                                                                                                                                                                                                                           | Sample Purpose              | State Collected                   | Sample Provider *     | Referenc |
|----------------------------------|----------------|-----------------------------------------------------------------------------------------------------------------------------------------------------------------------------------------------------------------------------------------------------------------------------------------------------------------------------------------------------------------------------------------|-----------------------------|-----------------------------------|-----------------------|----------|
| <i>Early Lyme Disease (n=70)</i> |                |                                                                                                                                                                                                                                                                                                                                                                                         |                             |                                   |                       |          |
| Age: 16-81                       | 70             | At least one EM present on initial visit to the clinic. Samples were collected at initial visit to the clinic and pre-treatment. Positive culture and/or PCR test for <i>B. burgdorferi</i> . Patients lived in an endemic area for Lyme disease.                                                                                                                                       | Discovery/Training and Test | NY                                | NYMC                  | (27)     |
| Male (52), Female (18)           |                |                                                                                                                                                                                                                                                                                                                                                                                         |                             |                                   |                       |          |
| <i>STARI (n=55)</i>              |                |                                                                                                                                                                                                                                                                                                                                                                                         |                             |                                   |                       |          |
| STARI Group 1                    | 33             | All patients had a physician-diagnosed erythema migrans-like rash $\geq 5$ cm and a recent history of possible or verified exposure to <i>Amblyomma americanum</i> (lone star) ticks before the onset of symptoms. Patients lived in a non-endemic area for Lyme disease with the exception of three patients. <sup>‡</sup> Samples were standard two-tiered negative for Lyme disease. | Discovery/Training and Test | NC, VA, GA, KY, TN, AL, IA and NE | CDC, Fort Collins, CO | (57)     |
| Age: 4-82                        |                |                                                                                                                                                                                                                                                                                                                                                                                         |                             |                                   |                       |          |
| Male (17), Female (16)           | 22             |                                                                                                                                                                                                                                                                                                                                                                                         |                             | MO                                | NYMC                  | (20)     |
| STARI Group 2                    |                |                                                                                                                                                                                                                                                                                                                                                                                         |                             |                                   |                       |          |
| Age: 8-80                        |                |                                                                                                                                                                                                                                                                                                                                                                                         |                             |                                   |                       |          |
| Male (13), Female (9)            |                |                                                                                                                                                                                                                                                                                                                                                                                         |                             |                                   |                       |          |
| <i>Healthy Donors (n=95)</i>     |                |                                                                                                                                                                                                                                                                                                                                                                                         |                             |                                   |                       |          |
| Healthy Group 1                  | 28             | No history of tick-borne disease within the last 12 months and lived in a non-endemic area for Lyme disease. Samples were standard two-tiered negative for Lyme disease.                                                                                                                                                                                                                | Discovery/Training and Test | CO                                | CDC, Fort Collins, CO | -        |
| Age: 18-unknown                  |                |                                                                                                                                                                                                                                                                                                                                                                                         |                             |                                   |                       |          |
| Male (8), Female (20)            | 30             | No history of Lyme disease and lived in an endemic area for Lyme disease. Samples were standard two-tiered negative for Lyme disease.                                                                                                                                                                                                                                                   |                             | NY                                | NYMC                  | -        |
| Healthy Group 2 <sup>‡#</sup>    |                |                                                                                                                                                                                                                                                                                                                                                                                         |                             |                                   |                       |          |
| Age: 18-74 <sup>§</sup>          |                |                                                                                                                                                                                                                                                                                                                                                                                         |                             |                                   |                       |          |
| Healthy Group 3 <sup>†</sup>     | 37             | No previous diagnosis with and/or treated for Lyme disease; and could not have lived within the past 10 years in a state with a high incidence of Lyme disease (Connecticut, Delaware, Maine, Maryland, Massachusetts, Minnesota, New Hampshire, New Jersey, New York, Pennsylvania, Vermont, Virginia and Wisconsin). Samples were standard two-tiered negative for Lyme disease.      | Verification <sup>¥</sup>   | FL                                | UCF (65)              | (65)     |
| Age: 18-60                       |                |                                                                                                                                                                                                                                                                                                                                                                                         |                             |                                   |                       |          |

\* Sample handling varied among laboratories that provided samples. <sup>‡</sup> Two patients were from southwest Iowa and one was from southeast Virginia; both areas are considered to have low risk for Lyme disease and a higher prevalence of *A. americanum* as compared to *I. scapularis*. <sup>†</sup> The gender of these donors was approximately 50% females and 50% males. <sup>#</sup> The sample were obtained from the same geographic location as the early Lyme disease samples. <sup>§</sup> Age ranged from 18-74 for all donors (n=100). Only a subset of 30 donors were used for this study. <sup>¥</sup> Healthy controls from Florida were used to verify that the dysregulation of MFs between EL and STARI were not due to regional differences.

**Table S2. 261 MF biosignature list.** The experimentally obtained mass of each MF was used to search against the Metlin database and the Human Metabolome Database (HMDB). The predicted chemical structures had to match to the MF mass within 15 ppm. MFs could have matches to multiple chemical structures of within the same classes of chemicals or to structures of a different chemical class. The putative chemical structure data obtained by interrogation against the HMDB were used to evaluate possible metabolic pathways that differed between early Lyme disease and STARI patients (see table S3).

| MF #        | m/z      | Mass      | Retention Time | Compound Predicted Formula                      | Predicted Chemical Structure (based on accurate mass)* | Metabolite Class or Pathway                      | Level of Identification | # of Alternate Chemical Structures $\pm$ 15 ppm | MFs in RF Model | MFs in 2 Way LASSO Model (38 MF) | MFs in 3 Way LASSO Model (82 MF) |
|-------------|----------|-----------|----------------|-------------------------------------------------|--------------------------------------------------------|--------------------------------------------------|-------------------------|-------------------------------------------------|-----------------|----------------------------------|----------------------------------|
| CSU/CDC-001 | 166.0852 | 165.078   | 1.86           | C <sub>9</sub> H <sub>11</sub> NO <sub>2</sub>  | Phenylalanine                                          | Phenylalanine metabolism                         | 1                       | > 5                                             | x               | x                                | x                                |
| CSU/CDC-002 | 239.0919 | 238.0844  | 11.66          | C <sub>12</sub> H <sub>14</sub> O <sub>5</sub>  | Trans-2, 3, 4-trimethoxycinnamate                      | Phenylpropanoid and polyketide metabolism        | 3                       | 5                                               | x               | x                                |                                  |
| CSU/CDC-003 | 886.4296 | 1770.8438 | 12.18          | -                                               | -                                                      | -                                                | 4                       | 0                                               | x               |                                  | x                                |
| CSU/CDC-004 | 181.0859 | 180.0788  | 14.7           | C <sub>10</sub> H <sub>12</sub> O <sub>3</sub>  | 5'-(3'-Methoxy-4'-hydroxyphenyl)-gamma-valerolactone   | Endogenous metabolite associated with microbiome | 3                       | > 5                                             | x               |                                  | x                                |
| CSU/CDC-005 | 223.0968 | 222.0895  | 14.69          | C <sub>12</sub> H <sub>14</sub> O <sub>4</sub>  | -                                                      | -                                                | 4                       | > 5                                             | x               |                                  |                                  |
| CSU/CDC-006 | 286.1444 | 285.1371  | 16.08          | C <sub>17</sub> H <sub>19</sub> NO <sub>3</sub> | Piperine                                               | Alkaloid metabolism                              | 1                       | > 5                                             | x               |                                  | x                                |
| CSU/CDC-007 | 286.1437 | 285.1364  | 16.06          | C <sub>17</sub> H <sub>19</sub> NO <sub>3</sub> | -                                                      | -                                                | 4                       | > 5                                             | x               |                                  |                                  |
| CSU/CDC-008 | 463.2339 | 462.2248  | 16.36          | C <sub>25</sub> H <sub>34</sub> O <sub>8</sub>  | Ala Lys Met Asn                                        | Peptide                                          | 3                       | > 5                                             | x               |                                  | x                                |

|             |           |           |       |                                                               |                                                  |                                        |   |     |   |   |   |
|-------------|-----------|-----------|-------|---------------------------------------------------------------|--------------------------------------------------|----------------------------------------|---|-----|---|---|---|
| CSU/CDC-009 | 242.2844  | 241.2772  | 17.1  | C <sub>16</sub> H <sub>35</sub> N                             | -                                                | -                                      | 4 | 1   | x |   | x |
| CSU/CDC-010 | 1112.6727 | 1111.6663 | 17.86 | -                                                             | -                                                | -                                      | 4 | 0   | x |   |   |
| CSU/CDC-011 | 454.2923  | 453.2867  | 18.08 | C <sub>21</sub> H <sub>44</sub> NO <sub>7</sub> P             | Glycerophospho- <i>N</i> -Palmitoyl Ethanolamine | <i>N</i> -acyl ethanolamine metabolism | 1 | > 5 | x |   |   |
| CSU/CDC-012 | 270.3156  | 269.3076  | 18.02 | C <sub>18</sub> H <sub>39</sub> N                             | -                                                | -                                      | 4 | 1   | x | x | x |
| CSU/CDC-013 | 284.3314  | 283.3236  | 18.13 | C <sub>19</sub> H <sub>41</sub> N                             | -                                                | -                                      | 4 | 1   | x | x | x |
| CSU/CDC-014 | 300.6407  | 599.268   | 18.27 | C <sub>33</sub> H <sub>37</sub> N <sub>5</sub> O <sub>6</sub> | Asp Phe Arg Tyr                                  | Peptide                                | 3 | > 5 | x | x | x |
| CSU/CDC-015 | 522.3580  | 521.3483  | 18.5  | C <sub>26</sub> H <sub>52</sub> NO <sub>7</sub> P             | PC(18:1)                                         | Glycerophospholipid metabolism         | 3 | > 5 | x |   |   |
| CSU/CDC-016 | 363.2192  | 362.2132  | 18.58 | C <sub>21</sub> H <sub>30</sub> O <sub>5</sub>                | 4,5 $\alpha$ -dihydrocortisone                   | Sterol metabolism                      | 3 | > 5 | x |   |   |
| CSU/CDC-017 | 590.4237  | 589.4194  | 19.24 | -                                                             | -                                                | -                                      | 4 | 0   | x |   | x |
| CSU/CDC-018 | 388.3939  | 387.3868  | 19.53 | -                                                             | -                                                | -                                      | 4 | 0   | x |   |   |
| CSU/CDC-020 | 256.2632  | 255.2561  | 20.08 | C <sub>16</sub> H <sub>33</sub> NO                            | Palmitic amide                                   | Primary Fatty Acid Amide Metabolism    | 1 | 1   | x |   |   |
| CSU/CDC-021 | 394.3515  | 376.3171  | 20.09 | -                                                             | -                                                | -                                      | 4 | 0   | x |   |   |
| CSU/CDC-022 | 228.1955  | 227.1885  | 20.99 | -                                                             | -                                                | -                                      | 4 | 0   | x |   |   |

|             |          |          |       |                                                                 |                                                                |                                           |   |     |   |   |   |
|-------------|----------|----------|-------|-----------------------------------------------------------------|----------------------------------------------------------------|-------------------------------------------|---|-----|---|---|---|
| CSU/CDC-023 | 284.2943 | 283.2872 | 21.15 | C <sub>18</sub> H <sub>37</sub> NO                              | Stearamide                                                     | Primary Fatty Acid Amide Metabolism       | 1 | 1   | x |   |   |
| CSU/CDC-024 | 338.3430 | 337.3344 | 22.14 | C <sub>22</sub> H <sub>43</sub> NO                              | 13Z-Docosenamide (Erucamide)                                   | Primary Fatty Acid Amide Metabolism       | 1 | 3   | x |   |   |
| CSU/CDC-025 | 689.5604 | 688.5504 | 22.52 | C <sub>38</sub> H <sub>77</sub> N <sub>2</sub> O <sub>6</sub> P | SM(d18:1-15:0) / SM(d18:1/14:1-OH)                             | Sphingolipid metabolism                   | 3 | > 5 | x |   |   |
| CSU/CDC-026 | 553.3904 | 552.3819 | 23.38 | C <sub>35</sub> H <sub>52</sub> O <sub>5</sub>                  | Furohyperforin                                                 | Endogenous metabolite - derived from food | 3 | 3   | x |   | x |
| CSU/CDC-027 | 432.2803 | 431.2727 | 10.8  | C <sub>25</sub> H <sub>37</sub> NO <sub>5</sub>                 | Ala Ile Lys Thr                                                | Peptide                                   | 3 | > 5 | x |   |   |
| CSU/CDC-028 | 389.2174 | 388.2094 | 15.47 | C <sub>19</sub> H <sub>32</sub> O <sub>8</sub>                  | Methyl 10,12,13,15-bisepidioxy-16-hydroperoxy-8E-octadecenoate | Fatty acid metabolism                     | 3 | > 5 | x | x |   |
| CSU/CDC-029 | 385.2211 | 384.2147 | 15.84 | C <sub>16</sub> H <sub>28</sub> N <sub>6</sub> O <sub>5</sub>   | Lys His Thr                                                    | Peptides                                  | 3 | > 5 | x |   |   |
| CSU/CDC-030 | 399.2364 | 398.2313 | 16.23 | -                                                               | -                                                              | -                                         | 4 | 0   | x |   | x |
| CSU/CDC-031 | 449.3261 | 879.6122 | 17.07 | C <sub>46</sub> H <sub>89</sub> NO <sub>12</sub> S              | C22-OH Sulfatide                                               | Sphingolipid metabolism                   | 3 | 2   | x |   |   |
| CSU/CDC-032 | 467.3821 | 444.2717 | 17.1  | C <sub>24</sub> H <sub>40</sub> O <sub>8</sub>                  | 2-glyceryl-6-keto-PGF1 $\alpha$                                | Prostaglandin metabolism                  | 3 | > 5 | x |   |   |
| CSU/CDC-033 | 836.5936 | 835.5845 | 17.15 | C <sub>44</sub> H <sub>85</sub> NO <sub>11</sub> S              | C20 Sulfatide                                                  | Sphingolipid metabolism                   | 3 | 1   | x |   |   |
| CSU/CDC-034 | 792.5646 | 791.5581 | 17.17 | C <sub>42</sub> H <sub>82</sub> NO <sub>10</sub> P              | PS(36:0)                                                       | Glycerophospholipid metabolism            | 3 | > 5 | x |   |   |



|             |          |           |       |                                                                 |               |                                |   |     |   |   |   |
|-------------|----------|-----------|-------|-----------------------------------------------------------------|---------------|--------------------------------|---|-----|---|---|---|
| CSU/CDC-035 | 356.2802 | 355.2722  | 17.35 | -                                                               | -             | -                              | 4 | 0   | x |   |   |
| CSU/CDC-036 | 806.5798 | 805.5746  | 17.71 | C <sub>43</sub> H <sub>84</sub> NO <sub>10</sub> P              | PS(37:0)      | Glycerophospholipid metabolism | 3 | > 5 | x |   |   |
| CSU/CDC-037 | 762.5582 | 761.5482  | 17.79 | C <sub>41</sub> H <sub>80</sub> NO <sub>9</sub> P               | PS-O(35:1)    | Glycerophospholipid metabolism | 3 | > 5 | x |   |   |
| CSU/CDC-038 | 718.5308 | 700.4946  | 17.88 | C <sub>39</sub> H <sub>73</sub> O <sub>8</sub> P                | PA(36:2)      | Glycerophospholipid metabolism | 3 | > 5 | x |   |   |
| CSU/CDC-039 | 734.5079 | 1449.9753 | 17.81 | -                                                               | -             | -                              | 4 | 0   | x | x | x |
| CSU/CDC-040 | 690.4825 | 1361.924  | 17.95 | -                                                               | -             | -                              | 4 | 0   | x |   |   |
| CSU/CDC-041 | 426.1798 | 425.1725  | 18.03 | -                                                               | -             | -                              | 4 | 0   | x |   |   |
| CSU/CDC-042 | 580.4144 | 1158.8173 | 18.26 | -                                                               | -             | -                              | 4 | 0   | x |   | x |
| CSU/CDC-043 | 741.5154 | 1481.0142 | 18.24 | C <sub>83</sub> H <sub>150</sub> O <sub>17</sub> P <sub>2</sub> | CL(74:6)      | Glycerophospholipid metabolism | 3 | 2   | x |   |   |
| CSU/CDC-044 | 864.6245 | 863.6166  | 18.17 | C <sub>46</sub> H <sub>89</sub> NO <sub>11</sub> S              | C22 Sulfatide | Sphingolipid metabolism        | 3 | 2   | x |   |   |
| CSU/CDC-045 | 558.4017 | 1080.7347 | 18.28 | -                                                               | -             | -                              | 4 | 0   | x |   |   |
| CSU/CDC-046 | 719.5012 | 1402.9377 | 18.26 | -                                                               | -             | -                              | 4 | 0   | x |   |   |
| CSU/CDC-047 | 536.3897 | 1053.7382 | 18.36 | -                                                               | -             | -                              | 4 | 0   | x |   |   |

|             |          |           |       |                                                                 |                 |                                |   |     |   |  |   |
|-------------|----------|-----------|-------|-----------------------------------------------------------------|-----------------|--------------------------------|---|-----|---|--|---|
| CSU/CDC-048 | 538.8674 | 1058.696  | 18.4  | -                                                               | -               | -                              | 4 | 0   | x |  |   |
| CSU/CDC-049 | 653.4619 | 1270.8593 | 18.43 | -                                                               | -               | -                              | 4 | 0   | x |  |   |
| CSU/CDC-050 | 732.5450 | 714.5092  | 18.47 | C <sub>40</sub> H <sub>75</sub> O <sub>8</sub> P                | PA(37:2)        | Glycerophospholipid metabolism | 3 | > 5 | x |  |   |
| CSU/CDC-051 | 748.5232 | 1478.0059 | 18.58 | -                                                               | -               | -                              | 4 | 0   | x |  |   |
| CSU/CDC-052 | 704.4985 | 1372.925  | 18.7  | -                                                               | -               | -                              | 4 | 0   | x |  | x |
| CSU/CDC-053 | 682.4841 | 1328.9008 | 18.77 | -                                                               | -               | -                              | 4 | 0   | x |  |   |
| CSU/CDC-054 | 360.3615 | 359.3555  | 18.89 | -                                                               | -               | -                              | 4 | 0   | x |  |   |
| CSU/CDC-055 | 441.2412 | 440.2325  | 19.09 | C <sub>20</sub> H <sub>32</sub> N <sub>4</sub> O <sub>7</sub>   | Pro Asp Pro Leu | Peptide                        | 3 | > 5 | x |  |   |
| CSU/CDC-056 | 638.4554 | 1240.847  | 18.92 | -                                                               | -               | -                              | 4 | 0   | x |  |   |
| CSU/CDC-057 | 755.5311 | 1474.9941 | 18.94 | C <sub>83</sub> H <sub>144</sub> O <sub>17</sub> P <sub>2</sub> | CL(74:9)        | Glycerophospholipid metabolism | 3 | 2   | x |  |   |
| CSU/CDC-058 | 711.5023 | 1386.9417 | 19.09 | -                                                               | -               | -                              | 4 | 0   | x |  |   |
| CSU/CDC-059 | 784.5530 | 1567.0908 | 19.27 | -                                                               | -               | -                              | 4 | 0   | x |  |   |
| CSU/CDC-060 | 645.4660 | 1271.8896 | 19.36 | -                                                               | -               | -                              | 4 | 0   | x |  |   |

|             |           |           |       |                                                                |                       |                                           |   |     |   |   |   |
|-------------|-----------|-----------|-------|----------------------------------------------------------------|-----------------------|-------------------------------------------|---|-----|---|---|---|
| CSU/CDC-061 | 623.4521  | 1210.8362 | 19.55 | -                                                              | -                     | -                                         | 4 | 0   | x |   | x |
| CSU/CDC-062 | 370.1837  | 369.1757  | 19.7  | C <sub>19</sub> H <sub>23</sub> N <sub>5</sub> O <sub>3</sub>  | -                     | -                                         | 4 | 1   | x | x | x |
| CSU/CDC-063 | 300.2886  | 282.2569  | 19.84 | C <sub>18</sub> H <sub>34</sub> O <sub>2</sub>                 | 13Z-octadecenoic acid | Fatty acid metabolism                     | 3 | > 5 | x |   |   |
| CSU/CDC-064 | 309.0981  | 308.0913  | 2.06  | C <sub>15</sub> H <sub>16</sub> O <sub>7</sub>                 | -                     | -                                         | 4 | 3   | x |   |   |
| CSU/CDC-065 | 561.2965  | 1120.5778 | 11.7  | C <sub>54</sub> H <sub>88</sub> O <sub>24</sub>                | Camellioside D        | Endogenous metabolite - derived from food | 3 | 5   | x |   |   |
| CSU/CDC-066 | 811.1942  | 810.1869  | 12.07 | C <sub>42</sub> H <sub>30</sub> N <sub>6</sub> O <sub>12</sub> | -                     | -                                         | 4 | 1   | x | x | x |
| CSU/CDC-067 | 947.7976  | 946.7936  | 14.55 | C <sub>62</sub> H <sub>106</sub> O <sub>6</sub>                | TAG(59:7)             | Triacylglycerol metabolism                | 3 | > 5 | x | x | x |
| CSU/CDC-068 | 1106.2625 | 2209.5193 | 14.53 | -                                                              | -                     | -                                         | 4 | 0   | x |   |   |
| CSU/CDC-069 | 371.2070  | 370.1997  | 15.52 | C <sub>15</sub> H <sub>26</sub> N <sub>6</sub> O <sub>7</sub>  | His Ser Lys           | Peptide                                   | 3 | > 5 | x |   |   |
| CSU/CDC-070 | 389.2178  | 388.2099  | 15.52 | C <sub>19</sub> H <sub>32</sub> O <sub>8</sub>                 | -                     | -                                         | 4 | > 5 | x |   | x |
| CSU/CDC-071 | 443.2649  | 442.256   | 15.52 | C <sub>19</sub> H <sub>34</sub> N <sub>6</sub> O <sub>6</sub>  | Pro Gln Ala Lys       | Peptide                                   | 3 | > 5 | x |   |   |
| CSU/CDC-072 | 410.2033  | 409.196   | 17.18 | -                                                              | -                     | -                                         | 4 | 3   | x | x | x |

|             |           |           |       |                                                               |                 |                                |   |     |   |   |   |
|-------------|-----------|-----------|-------|---------------------------------------------------------------|-----------------|--------------------------------|---|-----|---|---|---|
| CSU/CDC-073 | 850.6093  | 849.6009  | 17.63 | C <sub>48</sub> H <sub>84</sub> NO <sub>9</sub> P             | PS-O(42:6)      | Glycerophospholipid metabolism | 3 | 1   | x |   |   |
| CSU/CDC-074 | 1111.6690 | 1110.6656 | 17.89 | -                                                             | -               | -                              | 4 | 0   | x |   | x |
| CSU/CDC-075 | 1487.0005 | 1485.9987 | 18.17 | -                                                             | -               | -                              | 4 | 0   | x | x | x |
| CSU/CDC-076 | 697.4896  | 1358.909  | 18.32 | -                                                             | -               | -                              | 4 | 0   | x |   |   |
| CSU/CDC-077 | 439.8234  | 877.6325  | 18.71 | -                                                             | -               | -                              | 4 | 0   | x |   |   |
| CSU/CDC-078 | 567.8897  | 566.8818  | 18.73 | -                                                             | -               | -                              | 4 | 0   | x |   |   |
| CSU/CDC-079 | 435.2506  | 434.243   | 19    | C <sub>21</sub> H <sub>39</sub> O <sub>7</sub> P              | Lyso-PA(18:2)   | Glycerophospholipid metabolism | 3 | > 5 | x |   |   |
| CSU/CDC-080 | 834.6136  | 833.6057  | 18.83 | C <sub>45</sub> H <sub>88</sub> NO <sub>10</sub> P            | PS(39:0)        | Glycerophospholipid metabolism | 3 | > 5 | x |   |   |
| CSU/CDC-081 | 534.8834  | 533.8771  | 18.82 | -                                                             | -               | -                              | 4 | 0   | x |   |   |
| CSU/CDC-082 | 468.8441  | 467.8373  | 19.13 | -                                                             | -               | -                              | 4 | 0   | x |   |   |
| CSU/CDC-083 | 482.4040  | 481.3976  | 19.99 | -                                                             | -               | -                              | 4 | 0   | x |   | x |
| CSU/CDC-084 | 533.1929  | 532.1854  | 20.84 | C <sub>23</sub> H <sub>28</sub> N <sub>6</sub> O <sub>9</sub> | Asp His Phe Asp | Peptide                        | 3 | > 5 | x |   | x |
| CSU/CDC-085 | 312.3259  | 311.319   | 22.05 | -                                                             | -               | -                              | 4 | 0   | x |   |   |

|             |          |           |       |                                                               |                              |                                           |   |     |   |   |   |
|-------------|----------|-----------|-------|---------------------------------------------------------------|------------------------------|-------------------------------------------|---|-----|---|---|---|
| CSU/CDC-086 | 137.0463 | 136.0378  | 1.37  | C <sub>4</sub> H <sub>8</sub> O <sub>5</sub>                  | Threonate                    | Sugar metabolite                          | 3 | > 5 | x | x | x |
| CSU/CDC-087 | 466.3152 | 465.3085  | 14.73 | C <sub>26</sub> H <sub>43</sub> NO <sub>6</sub>               | Glycocholic acid             | Bile acid metabolism                      | 1 | 3   | x |   | x |
| CSU/CDC-088 | 228.1955 | 227.1884  | 15.22 | -                                                             | -                            | -                                         | 4 | 0   | x |   |   |
| CSU/CDC-089 | 385.2211 | 384.2143  | 15.83 | C <sub>20</sub> H <sub>32</sub> O <sub>7</sub>                | Lys His Thr                  | Peptide                                   | 3 | > 5 | x |   |   |
| CSU/CDC-090 | 403.2338 | 402.2253  | 15.84 | C <sub>16</sub> H <sub>30</sub> N <sub>6</sub> O <sub>6</sub> | Lys Gln Gln                  | Peptide                                   | 3 | > 5 | x |   |   |
| CSU/CDC-091 | 683.4728 | 1347.9062 | 17.56 | -                                                             | -                            | -                                         | 4 | 0   | x |   | x |
| CSU/CDC-092 | 675.4753 | 1348.9377 | 18.37 | -                                                             | -                            | -                                         | 4 | 0   | x |   |   |
| CSU/CDC-093 | 682.4841 | 1345.9257 | 18.76 | -                                                             | -                            | -                                         | 4 | 0   | x |   |   |
| CSU/CDC-094 | 762.5401 | 1506.0367 | 19.36 | -                                                             | -                            | -                                         | 4 | 0   | x |   |   |
| CSU/CDC-095 | 227.0897 | 204.1002  | 9.68  | C <sub>9</sub> H <sub>16</sub> O <sub>5</sub>                 | -                            | -                                         | 4 | 2   | x |   | x |
| CSU/CDC-177 | 189.1122 | 188.1049  | 12.27 | C <sub>9</sub> H <sub>14</sub> O <sub>4</sub>                 | Nonanedioic Acid             | Fatty acid metabolism                     | 1 | > 5 | x |   |   |
| CSU/CDC-097 | 169.0860 | 168.0786  | 9.94  | C <sub>9</sub> H <sub>12</sub> O <sub>3</sub>                 | 2,6-Dimethoxy-4-methylphenol | Endogenous metabolite - derived from food | 3 | > 5 | x |   |   |

|             |          |          |       |                                                                 |                             |                          |   |     |   |   |   |
|-------------|----------|----------|-------|-----------------------------------------------------------------|-----------------------------|--------------------------|---|-----|---|---|---|
| CSU/CDC-098 | 183.1016 | 182.0943 | 10.89 | C <sub>10</sub> H <sub>14</sub> O <sub>3</sub>                  | -                           | -                        | 4 | > 5 | x |   | x |
| CSU/CDC-099 | 476.3055 | 475.2993 | 11.09 | C <sub>26</sub> H <sub>41</sub> N <sub>3</sub> O <sub>5</sub>   | -                           | -                        | 4 | 5   | x |   | x |
| CSU/CDC-100 | 276.1263 | 275.1196 | 11.16 | C <sub>15</sub> H <sub>17</sub> NO <sub>4</sub>                 | -                           | -                        | 4 | 3   | x |   |   |
| CSU/CDC-101 | 314.0672 | 313.06   | 11.56 | C <sub>10</sub> H <sub>12</sub> N <sub>5</sub> O <sub>5</sub> P | -                           | -                        | 4 | 1   | x |   |   |
| CSU/CDC-102 | 201.1122 | 200.1047 | 11.56 | C <sub>10</sub> H <sub>16</sub> O <sub>4</sub>                  | Decenedioic acid            | Fatty acid metabolism    | 3 | > 5 | x |   |   |
| CSU/CDC-103 | 115.0391 | 114.0318 | 11.57 | C <sub>5</sub> H <sub>6</sub> O <sub>3</sub>                    | 2-Hydroxy-2,4-pentadienoate | Phenylalanine metabolism | 3 | > 5 | x |   |   |
| CSU/CDC-104 | 491.1569 | 490.1504 | 11.56 | C <sub>24</sub> H <sub>26</sub> O <sub>11</sub>                 | -                           | -                        | 4 | > 5 | x |   |   |
| CSU/CDC-105 | 241.1054 | 218.1157 | 11.57 | C <sub>10</sub> H <sub>18</sub> O <sub>5</sub>                  | 3-Hydroxy-sebacic acid      | Fatty acid metabolism    | 3 | 3   | x |   |   |
| CSU/CDC-106 | 105.0914 | 104.0841 | 11.57 | -                                                               | -                           |                          | 4 | 0   | x |   |   |
| CSU/CDC-107 | 811.7965 | 810.7882 | 12.07 | -                                                               | -                           | -                        | 4 | 0   | x | x | x |
| CSU/CDC-108 | 311.1472 | 328.1391 | 12.22 | C <sub>18</sub> H <sub>20</sub> N <sub>2</sub> O <sub>4</sub>   | Phe Tyr                     | Peptide                  | 3 | > 5 | x |   |   |
| CSU/CDC-109 | 271.1543 | 270.1464 | 12.24 | -                                                               | -                           | -                        | 4 | 0   | x |   |   |

|             |          |          |       |                                                                |                                 |                                           |   |     |   |  |   |
|-------------|----------|----------|-------|----------------------------------------------------------------|---------------------------------|-------------------------------------------|---|-----|---|--|---|
| CSU/CDC-110 | 169.0860 | 168.0787 | 12.24 | C <sub>9</sub> H <sub>12</sub> O <sub>3</sub>                  | 2,6-Dimethoxy-4-methylphenol    | Endogenous metabolite - derived from food | 3 | > 5 | x |  |   |
| CSU/CDC-111 | 187.0967 | 186.0889 | 12.24 | C <sub>9</sub> H <sub>14</sub> O <sub>4</sub>                  | -                               | -                                         | 4 | 4   | x |  |   |
| CSU/CDC-112 | 215.1283 | 214.1209 | 12.32 | C <sub>11</sub> H <sub>18</sub> O <sub>4</sub>                 | alpha-Carboxy-delta-decalactone | Endogenous metabolite - derived from food | 3 | 4   | x |  | x |
| CSU/CDC-113 | 475.1635 | 474.1547 | 12.25 | C <sub>25</sub> H <sub>22</sub> N <sub>4</sub> O <sub>6</sub>  | His Cys Asp Thr                 | Peptide                                   | 3 | > 5 | x |  |   |
| CSU/CDC-114 | 129.0547 | 128.0474 | 12.33 | C <sub>6</sub> H <sub>8</sub> O <sub>3</sub>                   | (4E)-2-Oxohexenoic acid         | Fatty acid metabolism                     | 3 | > 5 | x |  |   |
| CSU/CDC-115 | 519.1881 | 518.1813 | 12.33 | C <sub>20</sub> H <sub>30</sub> N <sub>4</sub> O <sub>12</sub> | Poly-g-D-glutamate              | Poly D-glutamate metabolism               | 3 | > 5 | x |  | x |
| CSU/CDC-116 | 125.0599 | 124.0527 | 13.12 | C <sub>7</sub> H <sub>8</sub> O <sub>2</sub>                   | 4-Methylcatechol                | Catechol metabolism                       | 3 | > 5 | x |  |   |
| CSU/CDC-117 | 247.1550 | 246.1469 | 13.13 | C <sub>12</sub> H <sub>22</sub> O <sub>5</sub>                 | 3-Hydroxy-dodecanedioic acid    | Fatty acid metabolism                     | 3 | 4   | x |  |   |
| CSU/CDC-118 | 517.2614 | 516.2544 | 13.13 | C <sub>21</sub> H <sub>36</sub> N <sub>6</sub> O <sub>9</sub>  | Gln Glu Gln Ile                 | Peptide                                   | 3 | > 5 | x |  |   |
| CSU/CDC-119 | 301.0739 | 300.0658 | 13.14 | C <sub>16</sub> H <sub>12</sub> O <sub>6</sub>                 | Chrysoeriol                     | Endogenous metabolite - derived from food | 3 | > 5 | x |  |   |
| CSU/CDC-120 | 327.1773 | 304.1885 | 14.17 | C <sub>16</sub> H <sub>24</sub> N <sub>4</sub> O <sub>2</sub>  | -                               | -                                         | 4 | 1   | x |  |   |

|             |           |           |       |                                                                 |                                                                                                         |                                           |   |     |   |  |   |
|-------------|-----------|-----------|-------|-----------------------------------------------------------------|---------------------------------------------------------------------------------------------------------|-------------------------------------------|---|-----|---|--|---|
| CSU/CDC-121 | 387.2023  | 386.1935  | 14.51 | C <sub>19</sub> H <sub>30</sub> O <sub>8</sub>                  | Citroside A                                                                                             | Endogenous metabolite - derived from food | 3 | > 5 | x |  |   |
| CSU/CDC-122 | 875.8451  | 1749.684  | 14.55 | -                                                               | -                                                                                                       | -                                         | 4 | 0   | x |  |   |
| CSU/CDC-123 | 737.5118  | 736.5056  | 14.52 | C <sub>42</sub> H <sub>73</sub> O <sub>8</sub> P                | PA(39:5)                                                                                                | Glycerophospholipid metabolism            | 3 | > 5 | x |  |   |
| CSU/CDC-124 | 1274.3497 | 1273.3481 | 14.96 | -                                                               | -                                                                                                       | -                                         | 4 | 0   | x |  |   |
| CSU/CDC-125 | 1274.2092 | 1273.2    | 14.96 | -                                                               | -                                                                                                       | -                                         | 4 | 0   | x |  |   |
| CSU/CDC-126 | 1486.5728 | 2971.1328 | 14.95 | -                                                               | -                                                                                                       | -                                         | 4 | 0   | x |  |   |
| CSU/CDC-127 | 965.3818  | 964.3727  | 15.37 | -                                                               | -                                                                                                       | -                                         | 4 | 0   | x |  |   |
| CSU/CDC-128 | 1086.1800 | 2170.3435 | 15.38 | -                                                               | -                                                                                                       | -                                         | 4 | 0   | x |  | x |
| CSU/CDC-129 | 1086.0562 | 2170.0908 | 15.38 | C <sub>97</sub> H <sub>167</sub> N <sub>5</sub> O <sub>48</sub> | NeuAcalpha2-3Galbeta1-3GalNAcbeta1-4(9-OAc-NeuAcalpha2-8NeuAcalpha2-3)Galbeta1-4Glcbeta-Cer(d18:1/18:0) | Sphingolipid metabolism                   | 3 | 1   | x |  |   |
| CSU/CDC-130 | 1086.4344 | 2169.8474 | 15.39 | -                                                               | -                                                                                                       | -                                         | 4 | 0   | x |  |   |
| CSU/CDC-131 | 1240.7800 | 1239.7712 | 15.38 | -                                                               | -                                                                                                       | -                                         | 4 | 0   | x |  |   |



|             |          |           |       |                                                                 |                                         |                                           |   |     |   |   |   |
|-------------|----------|-----------|-------|-----------------------------------------------------------------|-----------------------------------------|-------------------------------------------|---|-----|---|---|---|
| CSU/CDC-132 | 616.1776 | 615.1699  | 15.43 | -                                                               | -                                       | -                                         | 4 | 0   | x | x | x |
| CSU/CDC-133 | 285.2061 | 284.1993  | 15.99 | C <sub>16</sub> H <sub>28</sub> O <sub>4</sub>                  | -                                       | -                                         | 4 | 1   | x |   | x |
| CSU/CDC-134 | 357.1363 | 356.1284  | 15.98 | C <sub>20</sub> H <sub>20</sub> O <sub>6</sub>                  | Xanthoxylol                             | Endogenous metabolite - derived from food | 3 | > 5 | x |   | x |
| CSU/CDC-135 | 317.1956 | 316.1885  | 16.24 | C <sub>12</sub> H <sub>24</sub> N <sub>6</sub> O <sub>4</sub>   | Arg Ala Ala                             | Peptide                                   | 3 | > 5 | x |   |   |
| CSU/CDC-136 | 299.1853 | 298.1781  | 16.24 | C <sub>16</sub> H <sub>26</sub> O <sub>5</sub>                  | Tetranor-PGE1                           | Prostaglandin metabolism                  | 3 | > 5 | x |   | x |
| CSU/CDC-137 | 334.2580 | 333.2514  | 16.36 | -                                                               | -                                       | -                                         | 4 | 0   | x |   | x |
| CSU/CDC-138 | 317.2317 | 316.2254  | 16.63 | -                                                               | -                                       | -                                         | 4 | 0   | x |   | x |
| CSU/CDC-139 | 299.2219 | 298.2148  | 16.64 | C <sub>17</sub> H <sub>30</sub> O <sub>4</sub>                  | 8E-Heptadecenedioic acid                | Fatty acid metabolism                     | 3 | 2   | x |   |   |
| CSU/CDC-140 | 748.5408 | 747.5317  | 17.23 | C <sub>40</sub> H <sub>78</sub> NO <sub>9</sub> P               | PS-O(34:1)                              | Glycerophospholipid metabolism            | 3 | > 5 | x |   |   |
| CSU/CDC-141 | 331.2471 | 330.2403  | 17.26 | C <sub>18</sub> H <sub>34</sub> O <sub>5</sub>                  | 11,12,13-trihydroxy-9-octadecenoic acid | Fatty acid metabolism                     | 3 | > 5 | x |   | x |
| CSU/CDC-142 | 712.4935 | 1422.9749 | 17.82 | C <sub>79</sub> H <sub>140</sub> O <sub>17</sub> P <sub>2</sub> | CL(70:7)                                | Glycerophospholipid metabolism            | 3 | 1   | x |   |   |
| CSU/CDC-143 | 674.5013 | 673.4957  | 17.99 | C <sub>37</sub> H <sub>72</sub> NO <sub>7</sub> P               | PE-P(32:1)                              | Glycerophospholipid metabolism            | 3 | > 5 | x |   |   |

|             |          |           |       |                                                                 |                         |                                                     |   |     |   |   |   |
|-------------|----------|-----------|-------|-----------------------------------------------------------------|-------------------------|-----------------------------------------------------|---|-----|---|---|---|
| CSU/CDC-144 | 583.3480 | 582.3379  | 18.04 | C <sub>27</sub> H <sub>46</sub> N <sub>6</sub> O <sub>8</sub>   | Leu Lys Glu Pro Pro     | Peptide                                             | 3 | 1   | x |   | x |
| CSU/CDC-145 | 677.9537 | 676.9478  | 18.36 | -                                                               | -                       | -                                                   | 4 | 0   | x |   |   |
| CSU/CDC-146 | 531.3522 | 530.3457  | 18.4  | C <sub>35</sub> H <sub>46</sub> O <sub>4</sub>                  | -                       | -                                                   | 4 | 2   | x |   |   |
| CSU/CDC-147 | 585.2733 | 584.2649  | 18.39 | C <sub>33</sub> H <sub>36</sub> N <sub>4</sub> O <sub>6</sub>   | 15,16-Dihydrobiliverdin | Bilirubin breakdown products – Porphyrin metabolism | 3 | > 5 | x |   |   |
| CSU/CDC-148 | 513.3431 | 512.3352  | 18.4  | -                                                               | -                       | -                                                   | 4 | 0   | x |   |   |
| CSU/CDC-149 | 611.9156 | 610.9073  | 18.59 | -                                                               | -                       | -                                                   | 4 | 0   | x |   |   |
| CSU/CDC-150 | 549.0538 | 531.0181  | 18.38 | -                                                               | -                       | -                                                   | 4 | 0   | x |   |   |
| CSU/CDC-151 | 755.5311 | 1509.0457 | 18.93 | -                                                               | -                       | -                                                   | 4 | 0   | x |   |   |
| CSU/CDC-152 | 713.4492 | 712.4391  | 19.35 | C <sub>38</sub> H <sub>65</sub> O <sub>10</sub> P               | PG(32:5)                | Glycerophospholipid metabolism                      | 3 | 4   | x | x | x |
| CSU/CDC-153 | 599.4146 | 598.4079  | 19.59 | C <sub>40</sub> H <sub>54</sub> O <sub>4</sub>                  | Isomytiloxanthin        | Isoflavonoid                                        | 3 | > 5 | x |   |   |
| CSU/CDC-154 | 762.5029 | 761.4919  | 19.66 | C <sub>43</sub> H <sub>72</sub> N <sub>8</sub> O <sub>8</sub> P | PE(38:7)                | Glycerophospholipid metabolism                      | 3 | > 5 | x |   |   |
| CSU/CDC-155 | 502.3376 | 484.3039  | 19.87 | C <sub>27</sub> H <sub>40</sub> N <sub>4</sub> O <sub>4</sub>   | Gln Leu Pro Lys         | Peptide                                             | 3 | > 5 | x | x | x |

|             |          |          |       |                                                               |                                                                                         |                                           |   |     |   |   |   |
|-------------|----------|----------|-------|---------------------------------------------------------------|-----------------------------------------------------------------------------------------|-------------------------------------------|---|-----|---|---|---|
| CSU/CDC-156 | 741.4805 | 740.4698 | 19.96 | C <sub>40</sub> H <sub>69</sub> O <sub>10</sub> P             | PG(34:5)                                                                                | Glycerophospholipid metabolism            | 3 | > 5 | x |   |   |
| CSU/CDC-157 | 648.4672 | 647.4609 | 19.98 | C <sub>34</sub> H <sub>66</sub> NO <sub>8</sub> P             | PE(29:1)                                                                                | Glycerophospholipid metabolism            | 3 | > 5 | x |   | x |
| CSU/CDC-158 | 415.3045 | 414.2978 | 20.19 | -                                                             | -                                                                                       | -                                         | 4 | 0   | x | x | x |
| CSU/CDC-159 | 516.3532 | 498.3199 | 20.27 | C <sub>23</sub> H <sub>42</sub> N <sub>6</sub> O <sub>6</sub> | Ala Leu Ala Pro Lys                                                                     | Peptide                                   | 3 | 1   | x |   |   |
| CSU/CDC-160 | 769.5099 | 768.5018 | 20.53 | C <sub>42</sub> H <sub>73</sub> O <sub>10</sub> P             | PG(36:5)                                                                                | Glycerophospholipid metabolism            | 3 | > 5 | x |   |   |
| CSU/CDC-161 | 862.5881 | 861.5818 | 20.86 | -                                                             | -                                                                                       | -                                         | 4 | 0   | x |   |   |
| CSU/CDC-162 | 837.5358 | 836.5274 | 21.11 | C <sub>53</sub> H <sub>72</sub> O <sub>8</sub>                | Amitenone                                                                               | Endogenous metabolite - derived from food | 3 | 2   | x |   |   |
| CSU/CDC-163 | 558.3995 | 540.367  | 21.44 | C <sub>26</sub> H <sub>48</sub> N <sub>6</sub> O <sub>6</sub> | Leu Ala Pro Lys Ile                                                                     | Peptide                                   | 3 | 2   | x |   |   |
| CSU/CDC-164 | 366.3729 | 365.3655 | 22.79 | -                                                             | -                                                                                       | -                                         | 4 | 0   | x | x | x |
| CSU/CDC-165 | 445.2880 | 854.5087 | 12.48 | C <sub>45</sub> H <sub>74</sub> O <sub>15</sub>               | (3b,21b)-12-Oleanene-3,21,28-triol 28-[arabinosyl-(1->3)-arabinosyl-(1->3)-arabinoside] | Endogenous metabolite - derived from food | 3 | 1   | x |   | x |
| CSU/CDC-166 | 333.1446 | 332.1373 | 12.89 | C <sub>12</sub> H <sub>20</sub> N <sub>4</sub> O <sub>7</sub> | Glu Gln Gly                                                                             | Peptide                                   | 3 | > 5 | x | x | x |

|             |           |           |       |                                                               |                                                |                                           |   |     |   |  |  |
|-------------|-----------|-----------|-------|---------------------------------------------------------------|------------------------------------------------|-------------------------------------------|---|-----|---|--|--|
| CSU/CDC-167 | 1105.9305 | 2209.8462 | 14.53 | -                                                             | -                                              | -                                         | 4 | 0   | x |  |  |
| CSU/CDC-168 | 329.1049  | 328.0976  | 14.61 | C <sub>18</sub> H <sub>16</sub> O <sub>6</sub>                | 2-Oxo-3-phenylpropanoic acid                   | Phenylalanine metabolism                  | 3 | > 5 | x |  |  |
| CSU/CDC-169 | 1241.2053 | 1240.2    | 15.38 | -                                                             | -                                              | -                                         | 4 | 0   | x |  |  |
| CSU/CDC-170 | 1088.6731 | 1087.6676 | 17.85 | -                                                             | -                                              | -                                         | 4 | 0   | x |  |  |
| CSU/CDC-171 | 667.4391  | 666.4323  | 20.35 | C <sub>37</sub> H <sub>63</sub> O <sub>8</sub> P              | PA(24:5)                                       | Glycerophospholipid metabolism            | 3 | > 5 | x |  |  |
| CSU/CDC-172 | 133.0497  | 132.0423  | 11.57 | C <sub>5</sub> H <sub>8</sub> O <sub>4</sub>                  | 2-Acetolactic acid                             | Pantothenate and CoA Biosynthesis Pathway | 3 | > 5 | x |  |  |
| CSU/CDC-173 | 259.1540  | 258.1469  | 11.75 | -                                                             | -                                              | -                                         | 4 | 0   | x |  |  |
| CSU/CDC-174 | 311.1472  | 288.1574  | 12.23 | C <sub>10</sub> H <sub>20</sub> N <sub>6</sub> O <sub>4</sub> | Asn Arg                                        | Dipeptide                                 | 3 | > 5 | x |  |  |
| CSU/CDC-175 | 147.0652  | 146.0579  | 12.33 | C <sub>6</sub> H <sub>10</sub> O <sub>4</sub>                 | α-Ketopantoic acid                             | Pantothenate and CoA Biosynthesis Pathway | 3 | > 5 | x |  |  |
| CSU/CDC-176 | 169.0860  | 168.0788  | 12.29 | C <sub>9</sub> H <sub>12</sub> O <sub>3</sub>                 | Epoxyoxophorone                                | Endogenous metabolite - derived from food | 3 | > 5 | x |  |  |
| CSU/CDC-096 | 187.0965  | 186.0894  | 9.93  | C <sub>9</sub> H <sub>14</sub> O <sub>4</sub>                 | 5-Butyltetrahydro-2-oxo-3-furancarboxylic acid | Endogenous metabolite - derived from food | 3 | > 5 | x |  |  |

|             |           |           |       |                                                                 |                        |                                           |   |     |   |   |   |
|-------------|-----------|-----------|-------|-----------------------------------------------------------------|------------------------|-------------------------------------------|---|-----|---|---|---|
| CSU/CDC-178 | 139.1116  | 138.1044  | 12.95 | C <sub>9</sub> H <sub>14</sub> O <sub>4</sub>                   | 3,6-Nonadienal         | Endogenous metabolite - derived from food | 3 | > 5 | x |   |   |
| CSU/CDC-179 | 515.2811  | 514.2745  | 13.14 | C <sub>26</sub> H <sub>42</sub> O <sub>10</sub>                 | Cofaryloside           | Endogenous metabolite - derived from food | 3 | > 5 | x |   |   |
| CSU/CDC-180 | 283.1522  | 282.1444  | 13.93 | C <sub>25</sub> H <sub>42</sub> N <sub>2</sub> O <sub>7</sub> S | Epidihydrophaseic acid | Endogenous metabolite - derived from food | 3 | > 5 | x |   |   |
| CSU/CDC-181 | 1486.7386 | 2971.4668 | 14.97 | -                                                               | -                      | -                                         | 4 | 0   | x |   | x |
| CSU/CDC-182 | 285.2065  | 284.1991  | 16.02 | C <sub>16</sub> H <sub>28</sub> O <sub>4</sub>                  | -                      | -                                         | 4 | 1   | x | x |   |
| CSU/CDC-183 | 668.4686  | 1317.8969 | 18.04 | C <sub>16</sub> H <sub>28</sub> O <sub>4</sub>                  | Omphalotin A           | Endogenous metabolite - derived from food | 3 | 1   | x |   | x |
| CSU/CDC-184 | 454.2924  | 436.2587  | 18.1  | C <sub>21</sub> H <sub>41</sub> O <sub>7</sub> P                | Lyso-PA(18:1)          | Glycerophospholipid metabolism            | 3 | > 5 | x |   | x |
| CSU/CDC-185 | 706.9750  | 705.9684  | 18.7  | -                                                               | -                      | -                                         | 4 | 0   | x |   |   |
| CSU/CDC-186 | 607.9324  | 606.9246  | 19.01 | -                                                               | -                      | -                                         | 4 | 0   | x |   | x |
| CSU/CDC-187 | 834.5575  | 833.5502  | 20.32 | -                                                               | -                      | -                                         | 4 | 0   | x |   |   |
| CSU/CDC-188 | 521.4202  | 503.3858  | 21.06 | -                                                               | -                      | -                                         | 4 | 0   | x |   | x |

|             |          |           |       |                                                                 |                 |                                 |   |     |   |  |   |
|-------------|----------|-----------|-------|-----------------------------------------------------------------|-----------------|---------------------------------|---|-----|---|--|---|
| CSU/CDC-189 | 683.4727 | 1364.9294 | 17.54 | -                                                               | -               | -                               | 4 | 0   | x |  |   |
| CSU/CDC-190 | 728.9890 | 1455.9633 | 18.63 | -                                                               | -               | -                               | 4 | 1   | x |  |   |
| CSU/CDC-191 | 726.5104 | 1451.0035 | 18.64 | C <sub>81</sub> H <sub>144</sub> O <sub>17</sub> P <sub>2</sub> | CL(72:7)        | Glycerophospholipid metabolism  | 3 | 2   | x |  |   |
| CSU/CDC-192 | 633.9280 | 632.9206  | 18.47 | -                                                               | -               | -                               | 4 | 0   | x |  |   |
| CSU/CDC-193 | 176.0746 | 175.0667  | 2.31  | -                                                               | -               | -                               | 4 | 0   | x |  | x |
| CSU/CDC-194 | 596.9082 | 1191.8033 | 19.1  | -                                                               | -               | -                               | 4 | 0   | x |  | x |
| CSU/CDC-195 | 209.0784 | 208.0713  | 9.92  | C <sub>17</sub> H <sub>24</sub> O <sub>3</sub>                  | Benzylsuccinate | Phenylpropanoic acid metabolism | 3 | > 5 | x |  |   |
| CSU/CDC-196 | 792.5483 | 1566.055  | 18.46 | -                                                               | -               | -                               | 4 | 0   | x |  |   |
| CSU/CDC-197 | 618.9221 | 1218.8083 | 19.02 | -                                                               | -               | -                               | 4 | 0   | x |  |   |
| CSU/CDC-198 | 549.0543 | 531.0189  | 18.37 | -                                                               | -               | -                               | 4 | 0   | x |  |   |
| CSU/CDC-199 | 553.7262 | 552.7188  | 18.74 | -                                                               | -               | -                               | 4 | 0   | x |  |   |
| CSU/CDC-200 | 756.0320 | 755.0266  | 18.95 | -                                                               | -               | -                               | 4 | 0   | x |  |   |
| CSU/CDC-201 | 639.6307 | 638.6205  | 19.58 | -                                                               | -               | -                               | 4 | 0   | x |  |   |

|             |           |           |       |                                                                 |                                                                   |                                           |   |     |   |   |   |
|-------------|-----------|-----------|-------|-----------------------------------------------------------------|-------------------------------------------------------------------|-------------------------------------------|---|-----|---|---|---|
| CSU/CDC-202 | 753.4414  | 730.4513  | 19.37 | C <sub>42</sub> H <sub>67</sub> O <sub>8</sub> P                | PA(39:8)                                                          | Glycerophospholipid metabolism            | 3 | 2   | x |   |   |
| CSU/CDC-203 | 532.5606  | 531.5555  | 18.38 | -                                                               | -                                                                 | -                                         | 4 | 0   | x |   | x |
| CSU/CDC-204 | 279.1693  | 278.1629  | 11.05 | C <sub>15</sub> H <sub>22</sub> N <sub>2</sub> O <sub>3</sub>   | Phe Leu                                                           | Dipeptide                                 | 3 | > 5 | x | x |   |
| CSU/CDC-205 | 241.1069  | 240.0996  | 14.7  | C <sub>12</sub> H <sub>16</sub> O <sub>5</sub>                  | 3-Carboxy-4-methyl-5-propyl-2-furanpropanoic acid (CMPF)          | Fatty acid metabolism                     | 1 | > 5 | x | x | x |
| CSU/CDC-206 | 337.1667  | 336.1599  | 20.67 | C <sub>12</sub> H <sub>24</sub> N <sub>4</sub> O <sub>7</sub>   | -                                                                 | -                                         | 4 | 2   | x |   | x |
| CSU/CDC-207 | 328.3204  | 327.3148  | 20.72 | C <sub>20</sub> H <sub>41</sub> NO <sub>2</sub>                 | Stearoyl ethanolamide                                             | N-acyl ethanolamine metabolism            | 1 | 5   | x |   |   |
| CSU/CDC-208 | 514.3718  | 1009.7122 | 18.42 | C <sub>56</sub> H <sub>99</sub> NO <sub>14</sub>                | 3-O-acetyl-sphingosine-2,3,4,6-tetra-O-acetyl-GalCer(d18:1/h22:0) | Sphingolipid metabolism                   | 3 | 1   | x |   |   |
| CSU/CDC-209 | 630.4594  | 1241.8737 | 19.95 | -                                                               | -                                                                 | -                                         | 4 | 0   | x |   |   |
| CSU/CDC-210 | 415.1634  | 207.0784  | 12.2  | C <sub>8</sub> H <sub>9</sub> N <sub>5</sub> O <sub>2</sub>     | 6-Amino-9H-purine-9-propanoic acid                                | Endogenous metabolite - derived from food | 3 | 2   | x |   | x |
| CSU/CDC-211 | 464.1916  | 463.1849  | 13.05 | C <sub>16</sub> H <sub>29</sub> N <sub>7</sub> O <sub>7</sub> S | Arg Asp Cys Ala                                                   | Peptide                                   | 3 | > 5 | x | x | x |
| CSU/CDC-212 | 1249.2045 | 1248.1993 | 15.31 | -                                                               | -                                                                 | -                                         | 4 | 0   | x | x | x |
| CSU/CDC-213 | 1248.9178 | 1247.9141 | 15.3  | -                                                               | -                                                                 | -                                         | 4 | 0   | x | x | x |

|             |           |           |       |                                                 |                      |                                        |   |   |   |   |   |
|-------------|-----------|-----------|-------|-------------------------------------------------|----------------------|----------------------------------------|---|---|---|---|---|
| CSU/CDC-214 | 244.2270  | 243.22    | 17.17 | C <sub>14</sub> H <sub>29</sub> NO <sub>2</sub> | Lauroyl ethanolamide | <i>N</i> -acyl ethanolamine metabolism | 3 | 3 | x |   |   |
| CSU/CDC-215 | 463.3426  | 924.6699  | 18.08 | -                                               | -                    | -                                      | 4 | 0 | x |   |   |
| CSU/CDC-216 | 468.3892  | 450.3553  | 19.17 | C <sub>31</sub> H <sub>46</sub> O <sub>2</sub>  | -                    | -                                      | 4 | 1 | x |   |   |
| CSU/CDC-217 | 438.3787  | 420.3453  | 19.93 | -                                               | -                    | -                                      | 4 | 0 | x |   |   |
| CSU/CDC-218 | 364.3407  | 346.3068  | 20.72 | -                                               | -                    | -                                      | 4 | 0 | x |   | x |
| CSU/CDC-219 | 158.1539  | 157.1466  | 15.36 | -                                               | -                    | -                                      | 4 | 0 | x | x | x |
| CSU/CDC-220 | 792.0006  | 790.995   | 12.04 | -                                               | -                    | -                                      | 4 | 0 | x |   |   |
| CSU/CDC-221 | 792.2025  | 791.1947  | 12.04 | -                                               | -                    | -                                      | 4 | 0 | x |   |   |
| CSU/CDC-222 | 989.5004  | 1976.9858 | 12.03 | -                                               | -                    | -                                      | 4 | 0 | x |   | x |
| CSU/CDC-223 | 791.6016  | 790.594   | 12.04 | -                                               | -                    | -                                      | 4 | 0 | x |   |   |
| CSU/CDC-224 | 819.6064  | 1635.8239 | 12.06 | -                                               | -                    | -                                      | 4 | 0 | x |   | x |
| CSU/CDC-225 | 1115.5593 | 2228.1028 | 14.95 | -                                               | -                    | -                                      | 4 | 0 | x |   |   |
| CSU/CDC-226 | 1486.9176 | 2970.7976 | 14.96 | -                                               | -                    | -                                      | 4 | 0 | x |   |   |



|             |          |           |       |                                                               |                            |                                 |   |     |   |   |   |
|-------------|----------|-----------|-------|---------------------------------------------------------------|----------------------------|---------------------------------|---|-----|---|---|---|
| CSU/CDC-227 | 529.3381 | 528.3296  | 16.89 | C <sub>24</sub> H <sub>44</sub> N <sub>6</sub> O <sub>7</sub> | Gln Val Leu Leu Gly        | Peptide                         | 3 | 5   | x | x | x |
| CSU/CDC-228 | 430.3161 | 412.2845  | 20.23 | C <sub>23</sub> H <sub>40</sub> O <sub>6</sub>                | -                          | -                               | 4 | 1   | x |   |   |
| CSU/CDC-229 | 282.2776 | 264.2456  | 20.56 | C <sub>18</sub> H <sub>32</sub> O                             | -                          | -                               | 4 | > 5 | x | x | x |
| CSU/CDC-230 | 297.2793 | 296.2734  | 20.66 | C <sub>19</sub> H <sub>36</sub> O <sub>2</sub>                | Methyl oleate              | Oleic acid ester                | 1 | > 5 | x |   |   |
| CSU/CDC-231 | 714.3655 | 1426.718  | 11.73 | -                                                             | -                          | -                               | 4 | 0   | x |   |   |
| CSU/CDC-232 | 714.5306 | 1427.0479 | 11.76 | -                                                             | -                          | -                               | 4 | 0   | x |   |   |
| CSU/CDC-233 | 989.7499 | 1977.4865 | 12.03 | -                                                             | -                          | -                               | 4 | 0   | x |   |   |
| CSU/CDC-234 | 221.0744 | 220.0672  | 13.7  | C <sub>7</sub> H <sub>12</sub> N <sub>2</sub> O <sub>6</sub>  | L-beta-aspartyl-L-serine   | Peptide                         | 3 | > 5 | x |   |   |
| CSU/CDC-235 | 190.1260 | 189.1187  | 14.12 | C <sub>9</sub> H <sub>19</sub> NOS                            | 8-Methylthiooctanaldoxime  | 2-oxocarboxylic acid metabolism | 3 | 2   | x | x | x |
| CSU/CDC-019 | 300.2892 | 299.2821  | 19.66 | C <sub>18</sub> H <sub>37</sub> NO <sub>2</sub>               | Palmitoyl ethanolamide     | N-acyl ethanolamine metabolism  | 1 | > 5 | x |   |   |
| CSU/CDC-236 | 313.2734 | 312.2663  | 18.91 | C <sub>19</sub> H <sub>36</sub> O <sub>3</sub>                | 2-oxo-nonadecanoic acid    | Fatty acid metabolism           | 3 | 5   | x |   |   |
| CSU/CDC-237 | 286.2737 | 285.2666  | 19.08 | C <sub>17</sub> H <sub>35</sub> NO <sub>2</sub>               | Pentadecanoyl ethanolamide | N-acyl ethanolamine metabolism  | 1 | 4   | x |   | x |
| CSU/CDC-238 | 382.3675 | 381.3603  | 20.23 | C <sub>24</sub> H <sub>47</sub> NO <sub>2</sub>               | Erucicoyl ethanolamide     | N-acyl ethanolamine metabolism  | 3 | 1   | x | x | x |

|             |          |           |       |                                                 |                                                     |                                |   |     |   |   |   |
|-------------|----------|-----------|-------|-------------------------------------------------|-----------------------------------------------------|--------------------------------|---|-----|---|---|---|
| CSU/CDC-239 | 337.2712 | 314.282   | 20.66 | C <sub>19</sub> H <sub>38</sub> O <sub>3</sub>  | 2-Hydroxy-nonadecanoic acid                         | Fatty acid metabolism          | 3 | 2   | x |   |   |
| CSU/CDC-240 | 441.3687 | 440.3614  | 21.26 | C <sub>30</sub> H <sub>48</sub> O <sub>2</sub>  | 4,4-Dimethyl-14a-formyl-5a-cholesta-8,24-dien-3b-ol | Sterol metabolism              | 3 | > 5 | x |   |   |
| CSU/CDC-241 | 425.3735 | 424.3666  | 21.5  | C <sub>30</sub> H <sub>48</sub> O               | Butyrospermone                                      | Sterol metabolism              | 3 | > 5 | x |   |   |
| CSU/CDC-242 | 356.3517 | 355.3448  | 21.67 | C <sub>22</sub> H <sub>45</sub> NO <sub>2</sub> | Eicosanoyl ethanolamide                             | N-acyl ethanolamine metabolism | 1 | 2   | x |   |   |
| CSU/CDC-243 | 393.2970 | 370.3082  | 22.46 | C <sub>22</sub> H <sub>42</sub> O <sub>4</sub>  | -                                                   | -                              | 4 | 3   | x |   |   |
| CSU/CDC-244 | 477.2968 | 476.2898  | 22.79 | C <sub>31</sub> H <sub>40</sub> O <sub>4</sub>  | Lys Lys Thr Thr                                     | Peptide                        | 3 | > 5 | x | x | x |
| CSU/CDC-245 | 614.4833 | 613.4772  | 19.78 | -                                               | -                                                   | -                              | 4 | 0   | x |   | x |
| CSU/CDC-246 | 167.9935 | 166.9861  | 13.2  | C <sub>7</sub> H <sub>5</sub> NS <sub>2</sub>   | -                                                   | -                              | 4 | 1   | x |   |   |
| CSU/CDC-247 | 714.6967 | 1427.3824 | 11.76 | -                                               | -                                                   | -                              | 4 | 0   | x | x |   |
| CSU/CDC-248 | 459.3968 | 458.3904  | 19.08 | -                                               | -                                                   | -                              | 4 | 0   | x | x | x |
| CSU/CDC-249 | 677.6170 | 676.6095  | 20.71 | C <sub>47</sub> H <sub>80</sub> O <sub>2</sub>  | Cholesterol ester (20:2)                            | Sterol metabolism              | 3 | > 5 | x |   |   |
| CSU/CDC-250 | 298.2740 | 297.2668  | 16.44 | C <sub>18</sub> H <sub>35</sub> NO <sub>2</sub> | 3-Ketospingosine                                    | Sphingolipid metabolism        | 2 | > 5 | x |   | x |

|             |           |           |       |                                                                 |               |                               |   |     |   |   |   |
|-------------|-----------|-----------|-------|-----------------------------------------------------------------|---------------|-------------------------------|---|-----|---|---|---|
| CSU/CDC-251 | 460.2695  | 459.2627  | 16.87 | C <sub>26</sub> H <sub>37</sub> NO <sub>6</sub>                 | -             | -                             | 4 | > 5 | x |   |   |
| CSU/CDC-252 | 1003.7020 | 1002.696  | 18.46 | -                                                               | -             | -                             | 4 | 0   | x |   | x |
| CSU/CDC-253 | 342.2635  | 341.2565  | 15.62 | C <sub>19</sub> H <sub>35</sub> NO <sub>4</sub>                 | -             | -                             | 4 | 2   | x | x | x |
| CSU/CDC-254 | 529.3827  | 1022.6938 | 17.86 | -                                                               | -             | -                             | 4 | 0   | x | x | x |
| CSU/CDC-255 | 630.4765  | 612.4417  | 18.11 | -                                                               | -             | -                             | 4 | 0   | x |   |   |
| CSU/CDC-256 | 514.3734  | 1026.7281 | 18.41 | -                                                               | -             | -                             | 4 | 0   | x |   |   |
| CSU/CDC-257 | 667.4754  | 1315.916  | 19.28 | -                                                               | -             | -                             | 4 | 0   | x |   |   |
| CSU/CDC-258 | 459.2502  | 458.2429  | 19.02 | C <sub>23</sub> H <sub>39</sub> O <sub>7</sub> P                | Lyso PA(20:4) | Glycerohospholipid metabolism | 2 | > 5 | x | x | x |
| CSU/CDC-259 | 516.8549  | 1031.6945 | 18.43 | -                                                               | -             | -                             | 4 | 0   | x |   |   |
| CSU/CDC-260 | 740.5242  | 1479.0334 | 19.4  | C <sub>83</sub> H <sub>148</sub> O <sub>17</sub> P <sub>2</sub> | CL(74:7)      | Glycerohospholipid metabolism | 3 | 2   | x |   |   |
| CSU/CDC-261 | 1104.0614 | 2206.1096 | 15.2  | -                                                               | -             | -                             | 4 | 0   | x |   |   |

\* CSU/CDC-230 was positively identified as methyl oleate, a product that was likely an artifact of fatty acid methylation that occurred during sample processing

**Table S3. MetaboAnalyst results.** Total, the total number of compounds in the pathway; Hits, the actual number of compounds in the pathway matched from the 261 MF biosignature list; Raw p, the original p value calculated from the enrichment analysis; Impact, the pathway impact value calculated from pathway topology analysis. The MetaboAnalyst results were used to target specific MFs in the early Lyme disease-STARI biosignature for structural identification.

| Pathway Hit*                                          | Total | Expected | Hits           | Raw p    | -log(p) | Impact  |
|-------------------------------------------------------|-------|----------|----------------|----------|---------|---------|
| Glycerophospholipid metabolism                        | 39    | 1.2638   | 4 <sup>†</sup> | 0.035545 | 3.337   | 0.33235 |
| Sphingolipid metabolism                               | 25    | 0.81014  | 3 <sup>±</sup> | 0.045107 | 3.0987  | 0.15499 |
| Valine, leucine and isoleucine biosynthesis           | 27    | 0.87495  | 2              | 0.21724  | 1.5268  | 0.17117 |
| Phenylalanine metabolism                              | 45    | 1.4582   | 1              | 0.77605  | 0.25353 | 0.11906 |
| alpha-Linolenic acid metabolism                       | 29    | 0.93976  | 2              | 0.24148  | 1.421   | 0       |
| Glycosylphosphatidylinositol(GPI)-anchor biosynthesis | 14    | 0.45368  | 1              | 0.37027  | 0.99353 | 0.0439  |
| Linoleic acid metabolism                              | 15    | 0.48608  | 1              | 0.39079  | 0.93957 | 0       |
| Riboflavin metabolism                                 | 21    | 0.68052  | 1              | 0.50079  | 0.69157 | 0       |
| Phenylalanine, tyrosine and tryptophan biosynthesis   | 27    | 0.87495  | 1              | 0.59113  | 0.52572 | 0.00062 |
| Pantothenate and CoA biosynthesis                     | 27    | 0.87495  | 1              | 0.59113  | 0.52572 | 0.02002 |
| Steroid hormone biosynthesis                          | 99    | 3.2081   | 3              | 0.63116  | 0.4602  | 0.0382  |
| Glycerolipid metabolism                               | 32    | 1.037    | 1              | 0.65393  | 0.42476 | 0.01247 |
| Ubiquinone and other terpenoid-quinone biosynthesis   | 36    | 1.1666   | 1              | 0.69723  | 0.36064 | 0       |
| Nitrogen metabolism                                   | 39    | 1.2638   | 1              | 0.72615  | 0.32    | 0       |
| Butanoate metabolism                                  | 40    | 1.2962   | 1              | 0.73517  | 0.30766 | 0.04772 |
| Ascorbate and aldarate metabolism                     | 45    | 1.4582   | 1              | 0.77605  | 0.25353 | 0.00802 |
| Drug metabolism - cytochrome P450                     | 86    | 2.7869   | 2              | 0.77721  | 0.25205 | 0.0176  |
| Primary bile acid biosynthesis                        | 47    | 1.5231   | 1              | 0.7906   | 0.23496 | 0.00846 |

|                                          |     |        |   |         |          |         |
|------------------------------------------|-----|--------|---|---------|----------|---------|
| Lysine degradation                       | 47  | 1.5231 | 1 | 0.7906  | 0.23496  | 0.06505 |
| Fatty acid biosynthesis                  | 49  | 1.5879 | 1 | 0.80422 | 0.21788  | 0       |
| Fatty acid metabolism                    | 50  | 1.6203 | 1 | 0.81069 | 0.20986  | 0       |
| Starch and sucrose metabolism            | 50  | 1.6203 | 1 | 0.81069 | 0.20986  | 0.01265 |
| Pentose and glucuronate interconversions | 53  | 1.7175 | 1 | 0.82888 | 0.18768  | 0.009   |
| Arachidonic acid metabolism              | 62  | 2.0091 | 1 | 0.87371 | 0.135    | 0       |
| Aminoacyl-tRNA biosynthesis              | 75  | 2.4304 | 1 | 0.91874 | 0.084752 | 0       |
| Purine metabolism                        | 92  | 2.9813 | 1 | 0.95452 | 0.046547 | 0.00791 |
| Porphyrin and chlorophyll metabolism     | 104 | 3.3702 | 1 | 0.96989 | 0.030577 | 0.01101 |

\* The Holm adjust, the adjusted p value by the Holm-Bonferroni method and FDR, the p value adjusted using False Discovery Rate for the assigned pathway were 1 for all hits. This is due to small number of metabolites assigned in each pathway relative to the number of known metabolites in each pathway and the number of experimentally determined potential metabolites used in the analysis. †The four hits in the glycerophospholipid metabolism pathway were phosphatidic acid, phosphatidylethanolamine, phosphatidylcholine and lysophosphotidylcholine. ‡The three hits in the sphingolipid metabolism pathway were in sphingosine, dehydrosphinganine and sulfatide.

**Table S4. Regression coefficients ( $\beta$ ) of the LASSO two-way statistical model.** The regression coefficient for each of the 38 MFs (CSU/CDC-#) used in the LASSO two-way classification model are provided. The regression coefficients were generated with data from the Training-Set samples, and applied in the classification of the Test-Set samples as shown in table S5.

| <b>MF Id</b> | <b>Coefficient</b> |
|--------------|--------------------|
| Intercept    | -0.5089            |
| CSU/CDC-001  | -0.3032            |
| CSU/CDC-002  | -0.0359            |
| CSU/CDC-012  | -0.31              |
| CSU/CDC-013  | -0.2256            |
| CSU/CDC-014  | 0.05737            |
| CSU/CDC-028  | 0.21447            |
| CSU/CDC-039  | 0.29641            |
| CSU/CDC-062  | 0.0152             |
| CSU/CDC-066  | -0.0559            |
| CSU/CDC-067  | 0.63951            |
| CSU/CDC-072  | -0.1451            |
| CSU/CDC-075  | 0.10409            |
| CSU/CDC-086  | 0.71497            |
| CSU/CDC-107  | -0.2586            |
| CSU/CDC-132  | 0.88577            |
| CSU/CDC-152  | -0.6125            |
| CSU/CDC-155  | -0.0083            |
| CSU/CDC-158  | -0.027             |
| CSU/CDC-164  | 0.22005            |
| CSU/CDC-166  | -0.2033            |
| CSU/CDC-182  | -0.1077            |
| CSU/CDC-204  | -0.163             |
| CSU/CDC-205  | -0.8688            |
| CSU/CDC-211  | 0.43327            |
| CSU/CDC-212  | -0.3513            |
| CSU/CDC-213  | -0.422             |

|             |         |
|-------------|---------|
| CSU/CDC-219 | 1.01872 |
| CSU/CDC-227 | 0.43588 |
| CSU/CDC-229 | 0.11674 |
| CSU/CDC-235 | 0.3664  |
| CSU/CDC-019 | 0.52461 |
| CSU/CDC-238 | 0.7812  |
| CSU/CDC-244 | -0.7325 |
| CSU/CDC-247 | 0.00621 |
| CSU/CDC-248 | 0.38858 |
| CSU/CDC-253 | 0.10575 |
| CSU/CDC-254 | 0.27792 |
| CSU/CDC-258 | -0.5593 |

**Table S5. LASSO and RF two-way model classification probability scores.** The LASSO and RF probability scores are provided for each patient sample tested in duplicate. These are probability scores for the Test-Set samples. A probability score of  $\geq 0.5$  classified the samples as early Lyme disease (EL), and a probability score of  $< 0.5$  resulted in the sample being classified as STARI.

| Coded Sample ID | LASSO Probability Score | LASSO Classification | RF Probability Score | RF Classification | Sample ID     | Patient Type |
|-----------------|-------------------------|----------------------|----------------------|-------------------|---------------|--------------|
| Valb1618        | 0.9979                  | EL                   | 0.8980               | EL                | EDL134-022315 | EL           |
| Valb1591        | 0.9995                  | EL                   | 0.8980               | EL                | EDL134-120214 | EL           |
| Valb1454        | 0.9900                  | EL                   | 0.6320               | EL                | EDL135-022315 | EL           |
| Valb0820        | 0.5264                  | EL                   | 0.8660               | EL                | EDL135-120214 | EL           |
| Valb0989        | 0.9820                  | EL                   | 0.8620               | EL                | EDL136-022315 | EL           |
| Valb0546        | 0.8814                  | EL                   | 0.8960               | EL                | EDL136-120214 | EL           |
| Valb1573        | 0.9875                  | EL                   | 0.5840               | EL                | EDL137-022315 | EL           |
| Valb1299        | 0.7198                  | EL                   | 0.4380               | STARI             | EDL137-120214 | EL           |
| Valb0477        | 0.9247                  | EL                   | 0.7780               | EL                | EDL138-022315 | EL           |
| Valb0160        | 0.9868                  | EL                   | 0.9160               | EL                | EDL138-120214 | EL           |
| Valb0813        | 0.7300                  | EL                   | 0.4880               | STARI             | EDL139-022315 | EL           |
| Valb0443        | 0.8307                  | EL                   | 0.7680               | EL                | EDL139-120214 | EL           |
| Valb1412        | 0.9287                  | EL                   | 0.7200               | EL                | EDL140-022315 | EL           |



|          |        |    |        |    |               |    |
|----------|--------|----|--------|----|---------------|----|
| Valb0886 | 0.9045 | EL | 0.8140 | EL | EDL140-120214 | EL |
| Valb0827 | 0.9846 | EL | 0.9040 | EL | EDL71-022315  | EL |
| Valb0186 | 0.9609 | EL | 0.9180 | EL | EDL71-120214  | EL |
| Valb1337 | 0.9417 | EL | 0.8200 | EL | EDL73-022315  | EL |
| Valb0714 | 0.9836 | EL | 0.9000 | EL | EDL73-120214  | EL |
| Valb1510 | 0.9773 | EL | 0.7720 | EL | EDL74-022315  | EL |
| Valb0642 | 0.9986 | EL | 0.8520 | EL | EDL74-120214  | EL |
| Valb1586 | 0.9995 | EL | 0.9020 | EL | EDL75-022315  | EL |
| Valb1402 | 1.0000 | EL | 0.9160 | EL | EDL75-120214  | EL |
| Valb0593 | 0.9595 | EL | 0.8020 | EL | EDL76-022315  | EL |
| Valb0608 | 0.6940 | EL | 0.7980 | EL | EDL76-120214  | EL |
| Valb0808 | 0.9205 | EL | 0.8720 | EL | EDL77-022315  | EL |
| Valb0750 | 0.9998 | EL | 0.7240 | EL | EDL77-120214  | EL |
| Valb0907 | 0.9459 | EL | 0.6720 | EL | EDL78-022315  | EL |
| Valb0585 | 0.9891 | EL | 0.9180 | EL | EDL78-120214  | EL |
| Valb1638 | 0.9832 | EL | 0.6000 | EL | EDL79-022315  | EL |
| Valb1640 | 0.9906 | EL | 0.8500 | EL | EDL79-120214  | EL |
| Valb1430 | 0.9812 | EL | 0.7580 | EL | ELL06-022315  | EL |
| Valb1155 | 0.9995 | EL | 0.8080 | EL | ELL06-120214  | EL |

|          |        |       |        |    |              |    |
|----------|--------|-------|--------|----|--------------|----|
| Valb1553 | 0.9783 | EL    | 0.7780 | EL | ELL07-022315 | EL |
| Valb1562 | 0.9999 | EL    | 0.7920 | EL | ELL07-120214 | EL |
| Valb1445 | 0.8085 | EL    | 0.7160 | EL | ELL08-022315 | EL |
| Valb1188 | 0.9983 | EL    | 0.7860 | EL | ELL08-120214 | EL |
| Valb1613 | 0.9993 | EL    | 0.8640 | EL | ELL09-022315 | EL |
| Valb1514 | 1.0000 | EL    | 0.8820 | EL | ELL09-120214 | EL |
| Valb1479 | 0.3775 | STARI | 0.6320 | EL | ELL10-022315 | EL |
| Valb0933 | 0.9095 | EL    | 0.8380 | EL | ELL10-120214 | EL |
| Valb0923 | 0.7083 | EL    | 0.8120 | EL | ELL16-022315 | EL |
| Valb0338 | 0.7215 | EL    | 0.8320 | EL | ELL16-120214 | EL |
| Valb0783 | 0.7849 | EL    | 0.8880 | EL | ELL17-022315 | EL |
| Valb0261 | 0.9862 | EL    | 0.9120 | EL | ELL17-120214 | EL |
| Valb1264 | 0.9418 | EL    | 0.8240 | EL | ELL18-022315 | EL |
| Valb0545 | 0.9738 | EL    | 0.8480 | EL | ELL18-120214 | EL |
| Valb1427 | 0.9704 | EL    | 0.8480 | EL | ELL61-022315 | EL |
| Valb1071 | 0.9664 | EL    | 0.7620 | EL | ELL61-120214 | EL |
| Valb1211 | 0.7950 | EL    | 0.7360 | EL | ELL62-022315 | EL |
| Valb1217 | 0.7831 | EL    | 0.8360 | EL | ELL62-120214 | EL |
| Valb1414 | 0.9892 | EL    | 0.9100 | EL | ELL63-022315 | EL |

|          |        |       |        |       |              |       |
|----------|--------|-------|--------|-------|--------------|-------|
| Valb1104 | 0.9699 | EL    | 0.8600 | EL    | ELL63-120214 | EL    |
| Valb0736 | 0.9469 | EL    | 0.9300 | EL    | ELL64-022315 | EL    |
| Valb0384 | 0.9780 | EL    | 0.9040 | EL    | ELL64-120214 | EL    |
| Valb0672 | 0.9415 | EL    | 0.7680 | EL    | ELL65-022315 | EL    |
| Valb0300 | 0.9927 | EL    | 0.8920 | EL    | ELL65-120214 | EL    |
| Valb1018 | 0.9093 | EL    | 0.8320 | EL    | ELL66-022315 | EL    |
| Valb0458 | 0.8905 | EL    | 0.8480 | EL    | ELL66-120214 | EL    |
| Valb1356 | 0.9174 | EL    | 0.8100 | EL    | ELL67-022315 | EL    |
| Valb0492 | 0.9747 | EL    | 0.7260 | EL    | ELL67-120214 | EL    |
| Valb1561 | 0.0313 | STARI | 0.4860 | STARI | M06A-022315  | STARI |
| Valb1328 | 0.8608 | EL    | 0.6060 | EL    | M06A-120214  | STARI |
| Valb0329 | 0.1613 | STARI | 0.2680 | STARI | M09A-022315  | STARI |
| Valb0070 | 0.2476 | STARI | 0.4080 | STARI | M09A-120214  | STARI |
| Valb1052 | 0.0242 | STARI | 0.4060 | STARI | M13A-022315  | STARI |
| Valb0809 | 0.8461 | EL    | 0.8340 | EL    | M13A-120214B | STARI |
| Valb1256 | 0.0157 | STARI | 0.2900 | STARI | M16A-022315  | STARI |
| Valb1100 | 0.3798 | STARI | 0.4120 | STARI | M16A-120214  | STARI |
| Valb1236 | 0.2314 | STARI | 0.6800 | EL    | M19A-022315  | STARI |
| Valb0580 | 0.5508 | EL    | 0.6140 | EL    | M19A-120214  | STARI |

|          |        |       |        |       |             |       |
|----------|--------|-------|--------|-------|-------------|-------|
| Valb1525 | 0.7045 | EL    | 0.4720 | STARI | M22A-022315 | STARI |
| Valb0534 | 0.0496 | STARI | 0.4580 | STARI | M22A-120214 | STARI |
| Valb0556 | 0.1448 | STARI | 0.3400 | STARI | M26A-022315 | STARI |
| Valb0116 | 0.4234 | STARI | 0.2860 | STARI | M26A-120214 | STARI |
| Valb0461 | 0.0037 | STARI | 0.2360 | STARI | M27A-022315 | STARI |
| Valb0266 | 0.1015 | STARI | 0.2080 | STARI | M27A-120214 | STARI |
| Valb0447 | 0.0316 | STARI | 0.1220 | STARI | S03-022315  | STARI |
| Valb0026 | 0.0060 | STARI | 0.1420 | STARI | S03-120214  | STARI |
| Valb1114 | 0.0010 | STARI | 0.1760 | STARI | S09-022315  | STARI |
| Valb0464 | 0.0254 | STARI | 0.2120 | STARI | S09-120214  | STARI |
| Valb1292 | 0.0004 | STARI | 0.1280 | STARI | S17-022315  | STARI |
| Valb0754 | 0.0005 | STARI | 0.1020 | STARI | S17-120214  | STARI |
| Valb0434 | 0.0257 | STARI | 0.2520 | STARI | S21-022315  | STARI |
| Valb0044 | 0.0559 | STARI | 0.4300 | STARI | S21-120214  | STARI |
| Valb0873 | 0.0173 | STARI | 0.1840 | STARI | S33-022315  | STARI |
| Valb0352 | 0.0012 | STARI | 0.2200 | STARI | S33-120214  | STARI |
| Valb1141 | 0.0001 | STARI | 0.1120 | STARI | S39-022315  | STARI |
| Valb0480 | 0.0002 | STARI | 0.1160 | STARI | S39-120214  | STARI |
| Valb0618 | 0.0158 | STARI | 0.3220 | STARI | S43-022315  | STARI |

|          |        |       |        |       |            |       |
|----------|--------|-------|--------|-------|------------|-------|
| Valb0660 | 0.1493 | STARI | 0.3020 | STARI | S43-120214 | STARI |
| Valb0223 | 0.0007 | STARI | 0.0960 | STARI | S47-022315 | STARI |
| Valb0054 | 0.0095 | STARI | 0.0940 | STARI | S47-120214 | STARI |
| Valb0335 | 0.0093 | STARI | 0.0660 | STARI | S53-022315 | STARI |
| Valb0197 | 0.0183 | STARI | 0.0360 | STARI | S53-120214 | STARI |
| Valb0409 | 0.2080 | STARI | 0.2080 | STARI | S55-022315 | STARI |
| Valb0060 | 0.0332 | STARI | 0.1280 | STARI | S55-120214 | STARI |
| Valb0437 | 0.0004 | STARI | 0.0980 | STARI | S65-022315 | STARI |
| Valb0093 | 0.0003 | STARI | 0.1500 | STARI | S65-120214 | STARI |

**Table S6. Regression coefficients ( $\beta$ ) of the LASSO three-way statistical model.** The regression coefficient for each of the 82 MFs (CSU/CDC-#) used in the LASSO three-way classification model are provided. The regression coefficients were generated with data from the Training-Set samples, and applied in the classification of the Test-Set samples as shown in table S7.

| <b>MF Id</b> | <b>Early Lyme Disease</b> | <b>Healthy Controls</b> | <b>STARI</b> |
|--------------|---------------------------|-------------------------|--------------|
| Intercept    | 0.5755                    | -0.4927                 | -0.0828      |
| CSU/CDC-001  | 0.37556                   | 0                       | 0            |
| CSU/CDC-003  | 0                         | 0.4377                  | 0            |
| CSU/CDC-004  | 0                         | 0.00298                 | 0            |
| CSU/CDC-006  | 0.0704                    | 0                       | 0            |
| CSU/CDC-008  | -0.1193                   | 0                       | 0            |
| CSU/CDC-009  | 0.22921                   | 0                       | 0            |
| CSU/CDC-012  | 0.15307                   | 0                       | -0.2457      |
| CSU/CDC-013  | 0                         | 0                       | -0.1007      |
| CSU/CDC-014  | 0                         | 0                       | 0.72128      |
| CSU/CDC-017  | 0.11117                   | 0                       | 0            |
| CSU/CDC-026  | 0                         | -0.0633                 | 0.05925      |
| CSU/CDC-030  | 0                         | 0.05795                 | 0            |
| CSU/CDC-039  | 0                         | -0.6065                 | 0.06517      |
| CSU/CDC-042  | -0.4151                   | 0.02856                 | 0            |
| CSU/CDC-052  | 0                         | 0.05484                 | 0            |
| CSU/CDC-061  | 0                         | 0.08714                 | 0            |
| CSU/CDC-062  | 0                         | 0                       | 0.60672      |
| CSU/CDC-066  | 0                         | 0                       | -0.3676      |
| CSU/CDC-067  | -1.1528                   | 0                       | 0            |
| CSU/CDC-070  | -0.5929                   | 0.5531                  | 0            |
| CSU/CDC-072  | 0                         | 0                       | -0.0857      |
| CSU/CDC-074  | 0.01711                   | 0                       | 0            |
| CSU/CDC-075  | 0                         | 0                       | 0.18553      |
| CSU/CDC-083  | 0                         | -0.0872                 | 0            |
| CSU/CDC-084  | 0                         | -0.2013                 | 0.21541      |
| CSU/CDC-086  | -1.1622                   | 0                       | 0.06776      |
| CSU/CDC-087  | 0                         | 0.03553                 | 0            |
| CSU/CDC-091  | 0                         | -0.6683                 | 0            |

|             |         |         |         |
|-------------|---------|---------|---------|
| CSU/CDC-095 | 0       | 0       | -0.0694 |
| CSU/CDC-098 | 0       | 0.05396 | 0       |
| CSU/CDC-099 | 0       | -0.0398 | 0       |
| CSU/CDC-107 | 0.36836 | 0       | -0.1847 |
| CSU/CDC-112 | 0       | 1.11724 | 0       |
| CSU/CDC-115 | 0       | 0.12435 | 0       |
| CSU/CDC-128 | 0       | 0.4206  | -0.1927 |
| CSU/CDC-132 | 0       | 0       | 1.0998  |
| CSU/CDC-133 | 0.35613 | -0.1349 | 0       |
| CSU/CDC-134 | 0       | -0.1009 | 0       |
| CSU/CDC-136 | 0       | -1.2108 | 0       |
| CSU/CDC-137 | 0       | -0.2512 | 0       |
| CSU/CDC-138 | -0.0183 | 0       | 0       |
| CSU/CDC-141 | 0       | 0       | 0.2233  |
| CSU/CDC-144 | 0       | -0.1318 | 0       |
| CSU/CDC-152 | 0.70277 | 0       | 0       |
| CSU/CDC-155 | 0.27512 | 0       | 0       |
| CSU/CDC-157 | 0       | 0       | 0.0505  |
| CSU/CDC-158 | 0       | 1.89865 | 0       |
| CSU/CDC-164 | -0.2964 | 0       | 0       |
| CSU/CDC-165 | 0       | -0.4008 | 0       |
| CSU/CDC-166 | 0.14382 | 0       | 0       |
| CSU/CDC-181 | 0       | 1.3044  | 0       |
| CSU/CDC-183 | 0       | -0.7613 | 0.01014 |
| CSU/CDC-184 | 0.35021 | 0       | 0       |
| CSU/CDC-186 | 0       | 0.40861 | 0       |
| CSU/CDC-188 | 0       | 0.5533  | 0       |
| CSU/CDC-193 | 0       | -1.2355 | 0       |
| CSU/CDC-194 | 0       | 0.57412 | 0       |
| CSU/CDC-203 | -0.0308 | 0       | 0       |
| CSU/CDC-205 | 0.50193 | 0       | -0.3139 |
| CSU/CDC-206 | 0       | -0.0668 | 0       |
| CSU/CDC-210 | 0       | 0       | -0.218  |
| CSU/CDC-211 | -0.7208 | 0       | 0.20891 |
| CSU/CDC-212 | 0       | 0       | -0.0139 |
| CSU/CDC-213 | 0       | 0       | -0.2463 |

|             |         |         |         |
|-------------|---------|---------|---------|
| CSU/CDC-218 | 0       | 0.00722 | 0       |
| CSU/CDC-219 | -1.0252 | 0       | 0       |
| CSU/CDC-222 | 0       | -0.4632 | 0       |
| CSU/CDC-224 | 0       | -0.516  | 0       |
| CSU/CDC-227 | -0.4157 | 0       | 0.59261 |
| CSU/CDC-229 | 0       | 0       | 0.86651 |
| CSU/CDC-235 | -0.9905 | 0       | 0       |
| CSU/CDC-019 | 0       | -0.0326 | 0.52245 |
| CSU/CDC-237 | 0       | 0.62355 | 0       |
| CSU/CDC-238 | 0       | 0       | 0.96539 |
| CSU/CDC-244 | 1.5845  | 0       | 0       |
| CSU/CDC-245 | 0       | -1.3521 | 0       |
| CSU/CDC-248 | -0.0904 | 0       | 0.06017 |
| CSU/CDC-250 | 0       | 0       | -0.0882 |
| CSU/CDC-252 | 0       | -0.0646 | 0       |
| CSU/CDC-253 | 0       | 0       | 0.16563 |
| CSU/CDC-254 | -0.1985 | 0       | 0       |
| CSU/CDC-258 | 0       | 0       | -0.7011 |



**Table S7. LASSO and RF three-way model classification probability scores.** The LASSO and RF probability scores are provided for each patient sample tested in duplicate. These are probability scores for the Test-Set samples. Both the LASSO and RF classifiers provided a probability score for a sample being early Lyme disease patient (EL), healthy control (HC) and STARI. The sample was classified based on the highest probability score for membership in one of the three groups (EL, HC, or STARI).

| Coded Sample ID | LASSO Probability Score for EL | LASSO Probability Score for HC | LASSO Probability Score for STARI | LASSO Classification | RF Probability Score for EL | RF Probability Score for HC | RF Probability Score for STARI | RF Classification | Sample ID     | Patient Type |
|-----------------|--------------------------------|--------------------------------|-----------------------------------|----------------------|-----------------------------|-----------------------------|--------------------------------|-------------------|---------------|--------------|
| Valb1618        | 0.9998                         | 0.0000                         | 0.0002                            | EL                   | 0.8420                      | 0.0560                      | 0.1020                         | EL                | EDL134-022315 | EL           |
| Valb1591        | 1.0000                         | 0.0000                         | 0.0000                            | EL                   | 0.8600                      | 0.0320                      | 0.1080                         | EL                | EDL134-120214 | EL           |
| Valb1454        | 0.9978                         | 0.0003                         | 0.0019                            | EL                   | 0.5140                      | 0.0840                      | 0.4020                         | EL                | EDL135-022315 | EL           |
| Valb0820        | 0.9798                         | 0.0010                         | 0.0192                            | EL                   | 0.6560                      | 0.1140                      | 0.2300                         | EL                | EDL135-120214 | EL           |
| Valb0989        | 0.9765                         | 0.0190                         | 0.0045                            | EL                   | 0.3620                      | 0.5660                      | 0.0720                         | HC                | EDL136-022315 | EL           |
| Valb0546        | 0.9184                         | 0.0198                         | 0.0618                            | EL                   | 0.5760                      | 0.3360                      | 0.0880                         | EL                | EDL136-120214 | EL           |
| Valb1573        | 0.6006                         | 0.3980                         | 0.0015                            | EL                   | 0.4640                      | 0.1620                      | 0.3740                         | EL                | EDL137-022315 | EL           |
| Valb1299        | 0.0350                         | 0.0012                         | 0.9639                            | STARI                | 0.4640                      | 0.1380                      | 0.3980                         | EL                | EDL137-120214 | EL           |
| Valb0477        | 0.9823                         | 0.0001                         | 0.0175                            | EL                   | 0.5760                      | 0.2480                      | 0.1760                         | EL                | EDL138-022315 | EL           |

|          |        |        |        |    |        |        |        |    |                   |    |
|----------|--------|--------|--------|----|--------|--------|--------|----|-------------------|----|
| Valb0160 | 0.9570 | 0.0284 | 0.0146 | EL | 0.5800 | 0.3560 | 0.0640 | EL | EDL138<br>-120214 | EL |
| Valb0813 | 0.7815 | 0.1288 | 0.0897 | EL | 0.3380 | 0.3340 | 0.3280 | EL | EDL139<br>-022315 | EL |
| Valb0443 | 0.1403 | 0.8550 | 0.0047 | HC | 0.5140 | 0.3480 | 0.1380 | EL | EDL139<br>-120214 | EL |
| Valb1412 | 0.9258 | 0.0010 | 0.0732 | EL | 0.5260 | 0.1860 | 0.2880 | EL | EDL140<br>-022315 | EL |
| Valb0886 | 0.6301 | 0.1495 | 0.2204 | EL | 0.4060 | 0.4380 | 0.1560 | HC | EDL140<br>-120214 | EL |
| Valb0827 | 0.9395 | 0.0600 | 0.0005 | EL | 0.5600 | 0.3240 | 0.1160 | EL | EDL71-<br>022315  | EL |
| Valb0186 | 0.9623 | 0.0341 | 0.0036 | EL | 0.5460 | 0.3980 | 0.0560 | EL | EDL71-<br>120214  | EL |
| Valb1337 | 0.9873 | 0.0000 | 0.0127 | EL | 0.6840 | 0.0480 | 0.2680 | EL | EDL73-<br>022315  | EL |
| Valb0714 | 0.9991 | 0.0000 | 0.0009 | EL | 0.7480 | 0.0740 | 0.1780 | EL | EDL73-<br>120214  | EL |
| Valb1510 | 0.9795 | 0.0000 | 0.0205 | EL | 0.6700 | 0.1140 | 0.2160 | EL | EDL74-<br>022315  | EL |
| Valb0642 | 0.9990 | 0.0002 | 0.0008 | EL | 0.7280 | 0.1080 | 0.1640 | EL | EDL74-<br>120214  | EL |
| Valb1586 | 1.0000 | 0.0000 | 0.0000 | EL | 0.8180 | 0.0920 | 0.0900 | EL | EDL75-<br>022315  | EL |

|          |        |        |        |    |        |        |        |    |              |    |
|----------|--------|--------|--------|----|--------|--------|--------|----|--------------|----|
| Valb1402 | 1.0000 | 0.0000 | 0.0000 | EL | 0.8460 | 0.0640 | 0.0900 | EL | EDL75-120214 | EL |
| Valb0593 | 0.9699 | 0.0155 | 0.0146 | EL | 0.5380 | 0.3180 | 0.1440 | EL | EDL76-022315 | EL |
| Valb0608 | 0.2554 | 0.4250 | 0.3197 | HC | 0.4000 | 0.4320 | 0.1680 | HC | EDL76-120214 | EL |
| Valb0808 | 0.9747 | 0.0135 | 0.0118 | EL | 0.5080 | 0.3480 | 0.1440 | EL | EDL77-022315 | EL |
| Valb0750 | 1.0000 | 0.0000 | 0.0000 | EL | 0.5600 | 0.2140 | 0.2260 | EL | EDL77-120214 | EL |
| Valb0907 | 0.9570 | 0.0006 | 0.0424 | EL | 0.5640 | 0.1900 | 0.2460 | EL | EDL78-022315 | EL |
| Valb0585 | 0.8967 | 0.0837 | 0.0196 | EL | 0.5760 | 0.3440 | 0.0800 | EL | EDL78-120214 | EL |
| Valb1638 | 0.9978 | 0.0000 | 0.0022 | EL | 0.5880 | 0.0940 | 0.3180 | EL | EDL79-022315 | EL |
| Valb1640 | 0.9891 | 0.0000 | 0.0109 | EL | 0.8180 | 0.0700 | 0.1120 | EL | EDL79-120214 | EL |
| Valb1430 | 0.9960 | 0.0000 | 0.0040 | EL | 0.6740 | 0.0980 | 0.2280 | EL | ELL06-022315 | EL |
| Valb1155 | 0.9921 | 0.0073 | 0.0006 | EL | 0.7140 | 0.1020 | 0.1840 | EL | ELL06-120214 | EL |
| Valb1553 | 0.9522 | 0.0308 | 0.0170 | EL | 0.4940 | 0.3240 | 0.1820 | EL | ELL07-022315 | EL |

|          |        |        |        |       |        |        |        |    |              |    |
|----------|--------|--------|--------|-------|--------|--------|--------|----|--------------|----|
| Valb1562 | 0.9989 | 0.0011 | 0.0000 | EL    | 0.6360 | 0.1900 | 0.1740 | EL | ELL07-120214 | EL |
| Valb1445 | 0.8847 | 0.0032 | 0.1122 | EL    | 0.6300 | 0.1880 | 0.1820 | EL | ELL08-022315 | EL |
| Valb1188 | 0.9871 | 0.0124 | 0.0005 | EL    | 0.6260 | 0.1600 | 0.2140 | EL | ELL08-120214 | EL |
| Valb1613 | 1.0000 | 0.0000 | 0.0000 | EL    | 0.8320 | 0.0740 | 0.0940 | EL | ELL09-022315 | EL |
| Valb1514 | 1.0000 | 0.0000 | 0.0000 | EL    | 0.7780 | 0.1120 | 0.1100 | EL | ELL09-120214 | EL |
| Valb1479 | 0.2786 | 0.1610 | 0.5604 | STARI | 0.5340 | 0.2020 | 0.2640 | EL | ELL10-022315 | EL |
| Valb0933 | 0.5295 | 0.3586 | 0.1119 | EL    | 0.6060 | 0.2880 | 0.1060 | EL | ELL10-120214 | EL |
| Valb0923 | 0.6352 | 0.1147 | 0.2501 | EL    | 0.5600 | 0.2900 | 0.1500 | EL | ELL16-022315 | EL |
| Valb0338 | 0.4277 | 0.0788 | 0.4935 | STARI | 0.4760 | 0.4300 | 0.0940 | EL | ELL16-120214 | EL |
| Valb0783 | 0.8276 | 0.0090 | 0.1634 | EL    | 0.5720 | 0.3660 | 0.0620 | EL | ELL17-022315 | EL |
| Valb0261 | 0.9899 | 0.0038 | 0.0064 | EL    | 0.6060 | 0.3060 | 0.0880 | EL | ELL17-120214 | EL |
| Valb1264 | 0.7738 | 0.0116 | 0.2146 | EL    | 0.5880 | 0.2880 | 0.1240 | EL | ELL18-022315 | EL |

|          |        |        |        |    |        |        |        |    |              |    |
|----------|--------|--------|--------|----|--------|--------|--------|----|--------------|----|
| Valb0545 | 0.1309 | 0.8465 | 0.0225 | HC | 0.5000 | 0.3480 | 0.1520 | EL | ELL18-120214 | EL |
| Valb1427 | 0.9965 | 0.0022 | 0.0012 | EL | 0.5460 | 0.3180 | 0.1360 | EL | ELL61-022315 | EL |
| Valb1071 | 0.9949 | 0.0040 | 0.0011 | EL | 0.5240 | 0.3060 | 0.1700 | EL | ELL61-120214 | EL |
| Valb1211 | 0.6844 | 0.3003 | 0.0153 | EL | 0.4780 | 0.3280 | 0.1940 | EL | ELL62-022315 | EL |
| Valb1217 | 0.0136 | 0.9855 | 0.0009 | HC | 0.4560 | 0.4140 | 0.1300 | EL | ELL62-120214 | EL |
| Valb1414 | 0.9456 | 0.0523 | 0.0020 | EL | 0.6260 | 0.2680 | 0.1060 | EL | ELL63-022315 | EL |
| Valb1104 | 0.4263 | 0.5711 | 0.0026 | HC | 0.4460 | 0.4700 | 0.0840 | HC | ELL63-120214 | EL |
| Valb0736 | 0.8514 | 0.1341 | 0.0145 | EL | 0.4700 | 0.4880 | 0.0420 | HC | ELL64-022315 | EL |
| Valb0384 | 0.7501 | 0.2400 | 0.0100 | EL | 0.4000 | 0.5680 | 0.0320 | HC | ELL64-120214 | EL |
| Valb0672 | 0.9502 | 0.0479 | 0.0019 | EL | 0.4200 | 0.4660 | 0.1140 | HC | ELL65-022315 | EL |
| Valb0300 | 0.9441 | 0.0527 | 0.0032 | EL | 0.5220 | 0.4020 | 0.0760 | EL | ELL65-120214 | EL |
| Valb1018 | 0.2340 | 0.7645 | 0.0015 | HC | 0.3360 | 0.6140 | 0.0500 | HC | ELL66-022315 | EL |

|          |        |        |        |    |        |        |        |    |              |    |
|----------|--------|--------|--------|----|--------|--------|--------|----|--------------|----|
| Valb0458 | 0.5250 | 0.4676 | 0.0074 | EL | 0.2980 | 0.6620 | 0.0400 | HC | ELL66-120214 | EL |
| Valb1356 | 0.6663 | 0.3313 | 0.0024 | EL | 0.6480 | 0.1860 | 0.1660 | EL | ELL67-022315 | EL |
| Valb0492 | 0.7816 | 0.2169 | 0.0015 | EL | 0.5200 | 0.3160 | 0.1640 | EL | ELL67-120214 | EL |
| Valb0408 | 0.0012 | 0.9984 | 0.0004 | HC | 0.0840 | 0.8860 | 0.0300 | HC | HCN07-022315 | HC |
| Valb0311 | 0.0039 | 0.9653 | 0.0308 | HC | 0.0720 | 0.8880 | 0.0400 | HC | HCN07-120214 | HC |
| Valb0440 | 0.0006 | 0.9993 | 0.0001 | HC | 0.1480 | 0.8140 | 0.0380 | HC | HCN08-022315 | HC |
| Valb0123 | 0.0189 | 0.9758 | 0.0053 | HC | 0.1960 | 0.7700 | 0.0340 | HC | HCN08-120214 | HC |
| Valb0327 | 0.0029 | 0.9970 | 0.0001 | HC | 0.1180 | 0.8600 | 0.0220 | HC | HCN09-022315 | HC |
| Valb0112 | 0.0000 | 0.9995 | 0.0005 | HC | 0.0540 | 0.9260 | 0.0200 | HC | HCN09-120214 | HC |
| Valb1108 | 0.0042 | 0.9957 | 0.0001 | HC | 0.3780 | 0.5120 | 0.1100 | HC | HCN16-022315 | HC |
| Valb0269 | 0.0724 | 0.9238 | 0.0039 | HC | 0.0700 | 0.9120 | 0.0180 | HC | HCN16-120214 | HC |
| Valb0411 | 0.0243 | 0.9710 | 0.0047 | HC | 0.2760 | 0.6700 | 0.0540 | HC | HCN17-022315 | HC |

|          |        |        |        |    |        |        |        |    |              |    |
|----------|--------|--------|--------|----|--------|--------|--------|----|--------------|----|
| Valb0029 | 0.0491 | 0.9435 | 0.0074 | HC | 0.0620 | 0.9220 | 0.0160 | HC | HCN17-120214 | HC |
| Valb0860 | 0.1211 | 0.8540 | 0.0250 | HC | 0.3560 | 0.4300 | 0.2140 | HC | HCN18-022315 | HC |
| Valb0302 | 0.0198 | 0.9792 | 0.0010 | HC | 0.0240 | 0.9720 | 0.0040 | HC | HCN18-120214 | HC |
| Valb0709 | 0.0060 | 0.9930 | 0.0010 | HC | 0.2980 | 0.5740 | 0.1280 | HC | HCN19-022315 | HC |
| Valb0178 | 0.0024 | 0.9940 | 0.0036 | HC | 0.0480 | 0.9260 | 0.0260 | HC | HCN19-120214 | HC |
| Valb0962 | 0.0978 | 0.8543 | 0.0479 | HC | 0.3700 | 0.4420 | 0.1880 | HC | HCN25-022315 | HC |
| Valb0418 | 0.6988 | 0.1304 | 0.1708 | EL | 0.2500 | 0.5540 | 0.1960 | HC | HCN25-120214 | HC |
| Valb0632 | 0.0014 | 0.9982 | 0.0005 | HC | 0.1080 | 0.8440 | 0.0480 | HC | HCN28-022315 | HC |
| Valb0124 | 0.0226 | 0.9655 | 0.0119 | HC | 0.0800 | 0.8780 | 0.0420 | HC | HCN28-120214 | HC |
| Valb0690 | 0.9013 | 0.0929 | 0.0058 | EL | 0.5920 | 0.3340 | 0.0740 | EL | HCN29-022315 | HC |
| Valb0066 | 0.0876 | 0.8866 | 0.0257 | HC | 0.1260 | 0.8560 | 0.0180 | HC | HCN29-120214 | HC |
| Valb1466 | 0.0038 | 0.9957 | 0.0005 | HC | 0.1860 | 0.7800 | 0.0340 | HC | HCW13-022315 | HC |

|          |        |        |        |    |        |        |        |    |                  |    |
|----------|--------|--------|--------|----|--------|--------|--------|----|------------------|----|
| Valb0777 | 0.2406 | 0.7540 | 0.0054 | HC | 0.1320 | 0.8560 | 0.0120 | HC | HCW13<br>-120214 | HC |
| Valb1405 | 0.0021 | 0.9959 | 0.0019 | HC | 0.2540 | 0.5900 | 0.1560 | HC | HCW21<br>-022315 | HC |
| Valb0802 | 0.2993 | 0.6973 | 0.0034 | HC | 0.1660 | 0.8180 | 0.0160 | HC | HCW21<br>-120214 | HC |
| Valb1254 | 0.5258 | 0.4539 | 0.0203 | EL | 0.4020 | 0.3720 | 0.2260 | EL | HCW25<br>-022315 | HC |
| Valb0697 | 0.0064 | 0.9906 | 0.0031 | HC | 0.4060 | 0.4180 | 0.1760 | HC | HCW25<br>-120214 | HC |
| Valb1138 | 0.0005 | 0.9988 | 0.0007 | HC | 0.1720 | 0.7260 | 0.1020 | HC | HCW26<br>-022315 | HC |
| Valb0520 | 0.0041 | 0.9956 | 0.0004 | HC | 0.1580 | 0.7940 | 0.0480 | HC | HCW26<br>-120214 | HC |
| Valb1119 | 0.0001 | 0.9998 | 0.0001 | HC | 0.2120 | 0.7240 | 0.0640 | HC | HCW28<br>-022315 | HC |
| Valb0572 | 0.1165 | 0.8831 | 0.0004 | HC | 0.1180 | 0.8600 | 0.0220 | HC | HCW28<br>-120214 | HC |
| Valb0943 | 0.0616 | 0.9320 | 0.0064 | HC | 0.2260 | 0.5440 | 0.2300 | HC | HCW29<br>-022315 | HC |
| Valb0419 | 0.3990 | 0.5992 | 0.0018 | HC | 0.2480 | 0.6840 | 0.0680 | HC | HCW29<br>-120214 | HC |
| Valb1282 | 0.0191 | 0.6025 | 0.3783 | HC | 0.2980 | 0.4380 | 0.2640 | HC | HCW34<br>-022315 | HC |



|          |        |        |        |       |        |        |        |       |                  |       |
|----------|--------|--------|--------|-------|--------|--------|--------|-------|------------------|-------|
| Valb0719 | 0.0209 | 0.9768 | 0.0024 | HC    | 0.0980 | 0.8980 | 0.0040 | HC    | HCW34<br>-120214 | HC    |
| Valb1535 | 0.0056 | 0.9885 | 0.0059 | HC    | 0.2160 | 0.5380 | 0.2460 | HC    | HCW37<br>-022315 | HC    |
| Valb1091 | 0.0163 | 0.9766 | 0.0071 | HC    | 0.2120 | 0.7280 | 0.0600 | HC    | HCW37<br>-120214 | HC    |
| Valb1509 | 0.1004 | 0.8845 | 0.0151 | HC    | 0.3080 | 0.5860 | 0.1060 | HC    | HCW44<br>-022315 | HC    |
| Valb0944 | 0.0532 | 0.9143 | 0.0325 | HC    | 0.2300 | 0.7280 | 0.0420 | HC    | HCW44<br>-120214 | HC    |
| Valb1349 | 0.0037 | 0.9898 | 0.0066 | HC    | 0.3080 | 0.6100 | 0.0820 | HC    | HCW46<br>-022315 | HC    |
| Valb0801 | 0.0039 | 0.9822 | 0.0139 | HC    | 0.2640 | 0.6500 | 0.0860 | HC    | HCW46<br>-120214 | HC    |
| Valb1561 | 0.0005 | 0.0000 | 0.9995 | STARI | 0.0044 | 0.1788 | 0.8168 | STARI | M06A-<br>022315  | STARI |
| Valb1328 | 0.6469 | 0.0097 | 0.3434 | EL    | 0.5180 | 0.0960 | 0.3860 | EL    | M06A-<br>120214  | STARI |
| Valb0329 | 0.2186 | 0.0048 | 0.7767 | STARI | 0.2140 | 0.0740 | 0.7120 | STARI | M09A-<br>022315  | STARI |
| Valb0070 | 0.0212 | 0.0066 | 0.9722 | STARI | 0.2480 | 0.0980 | 0.6540 | STARI | M09A-<br>120214  | STARI |
| Valb1052 | 0.0298 | 0.0061 | 0.9640 | STARI | 0.3840 | 0.1920 | 0.4240 | STARI | M13A-<br>022315  | STARI |

|          |        |        |        |       |        |        |        |       |                  |       |
|----------|--------|--------|--------|-------|--------|--------|--------|-------|------------------|-------|
| Valb0809 | 0.9494 | 0.0020 | 0.0486 | EL    | 0.6200 | 0.1560 | 0.2240 | EL    | M13A-120214<br>B | STARI |
| Valb1256 | 0.0016 | 0.0002 | 0.9982 | STARI | 0.2340 | 0.1440 | 0.6220 | STARI | M16A-022315      | STARI |
| Valb1100 | 0.0232 | 0.0055 | 0.9713 | STARI | 0.2400 | 0.0820 | 0.6780 | STARI | M16A-120214      | STARI |
| Valb1236 | 0.1166 | 0.0227 | 0.8607 | STARI | 0.4740 | 0.2340 | 0.2920 | EL    | M19A-022315      | STARI |
| Valb0580 | 0.1942 | 0.1003 | 0.7055 | STARI | 0.4080 | 0.1800 | 0.4120 | STARI | M19A-120214      | STARI |
| Valb1525 | 0.9962 | 0.0000 | 0.0038 | EL    | 0.3660 | 0.1700 | 0.4640 | STARI | M22A-022315      | STARI |
| Valb0534 | 0.1791 | 0.0000 | 0.8208 | STARI | 0.3520 | 0.1880 | 0.4600 | STARI | M22A-120214      | STARI |
| Valb0556 | 0.3684 | 0.1161 | 0.5155 | STARI | 0.3120 | 0.0300 | 0.6580 | STARI | M26A-022315      | STARI |
| Valb0116 | 0.4121 | 0.0005 | 0.5874 | STARI | 0.1900 | 0.0560 | 0.7540 | STARI | M26A-120214      | STARI |
| Valb0461 | 0.0048 | 0.0293 | 0.9659 | STARI | 0.2000 | 0.0860 | 0.7140 | STARI | M27A-022315      | STARI |
| Valb0266 | 0.0169 | 0.0001 | 0.9830 | STARI | 0.1300 | 0.0560 | 0.8140 | STARI | M27A-120214      | STARI |
| Valb0447 | 0.0016 | 0.1106 | 0.8877 | STARI | 0.1280 | 0.0780 | 0.7940 | STARI | S03-022315       | STARI |

|          |        |        |        |       |        |        |        |       |            |       |
|----------|--------|--------|--------|-------|--------|--------|--------|-------|------------|-------|
| Valb0026 | 0.0005 | 0.0004 | 0.9992 | STARI | 0.1320 | 0.0640 | 0.8040 | STARI | S03-120214 | STARI |
| Valb1114 | 0.0013 | 0.0004 | 0.9982 | STARI | 0.1800 | 0.2660 | 0.5540 | STARI | S09-022315 | STARI |
| Valb0464 | 0.1404 | 0.0000 | 0.8596 | STARI | 0.1320 | 0.2000 | 0.6680 | STARI | S09-120214 | STARI |
| Valb1292 | 0.0002 | 0.0000 | 0.9997 | STARI | 0.1360 | 0.1980 | 0.6660 | STARI | S17-022315 | STARI |
| Valb0754 | 0.0001 | 0.0000 | 0.9999 | STARI | 0.0980 | 0.1480 | 0.7540 | STARI | S17-120214 | STARI |
| Valb0434 | 0.0209 | 0.0896 | 0.8896 | STARI | 0.1780 | 0.2000 | 0.6220 | STARI | S21-022315 | STARI |
| Valb0044 | 0.0148 | 0.0203 | 0.9649 | STARI | 0.2560 | 0.1920 | 0.5520 | STARI | S21-120214 | STARI |
| Valb0873 | 0.0079 | 0.0169 | 0.9753 | STARI | 0.1340 | 0.2480 | 0.6180 | STARI | S33-022315 | STARI |
| Valb0352 | 0.0003 | 0.0087 | 0.9910 | STARI | 0.1280 | 0.2180 | 0.6540 | STARI | S33-120214 | STARI |
| Valb1141 | 0.0000 | 0.0169 | 0.9831 | STARI | 0.1060 | 0.1100 | 0.7840 | STARI | S39-022315 | STARI |
| Valb0480 | 0.0000 | 0.0002 | 0.9998 | STARI | 0.0540 | 0.0500 | 0.8960 | STARI | S39-120214 | STARI |
| Valb0618 | 0.0015 | 0.0010 | 0.9975 | STARI | 0.2640 | 0.2060 | 0.5300 | STARI | S43-022315 | STARI |

|          |        |        |        |       |        |        |        |       |            |       |
|----------|--------|--------|--------|-------|--------|--------|--------|-------|------------|-------|
| Valb0660 | 0.0018 | 0.0008 | 0.9973 | STARI | 0.2700 | 0.1400 | 0.5900 | STARI | S43-120214 | STARI |
| Valb0223 | 0.0002 | 0.0340 | 0.9658 | STARI | 0.1080 | 0.3080 | 0.5840 | STARI | S47-022315 | STARI |
| Valb0054 | 0.0023 | 0.0168 | 0.9808 | STARI | 0.0640 | 0.0740 | 0.8620 | STARI | S47-120214 | STARI |
| Valb0335 | 0.0085 | 0.0023 | 0.9893 | STARI | 0.0660 | 0.0440 | 0.8900 | STARI | S53-022315 | STARI |
| Valb0197 | 0.0050 | 0.0001 | 0.9949 | STARI | 0.0320 | 0.0320 | 0.9360 | STARI | S53-120214 | STARI |
| Valb0409 | 0.0714 | 0.0715 | 0.8571 | STARI | 0.1680 | 0.1420 | 0.6900 | STARI | S55-022315 | STARI |
| Valb0060 | 0.0119 | 0.0059 | 0.9821 | STARI | 0.1020 | 0.1180 | 0.7800 | STARI | S55-120214 | STARI |
| Valb0437 | 0.0001 | 0.0078 | 0.9921 | STARI | 0.0800 | 0.1060 | 0.8140 | STARI | S65-022315 | STARI |
| Valb0093 | 0.0000 | 0.0001 | 0.9999 | STARI | 0.1060 | 0.0720 | 0.8220 | STARI | S65-120214 | STARI |

**Table S8. ANOVA results on Lasso and Random Forest scores with sample source as the explanatory variable.** Shown are the simultaneous 95% confidence intervals using Tukey's method for the difference in mean LASSO score between groups and the Random Forest difference in mean log probability between groups. CI, confidence interval; RF, Random Forest.

| Linear hypothesis* | Simultaneous 95% CI (Tukey) <sup>‡</sup> |                    |                                                      |                                            |
|--------------------|------------------------------------------|--------------------|------------------------------------------------------|--------------------------------------------|
|                    | LASSO Healthy Control scores             | LASSO STARI scores | Healthy Control classification probabilities from RF | STARI classification probabilities from RF |
| MO - CO == 0       | -10.3 to -7.1                            | 3.3 to 5.6         | -3.5 to -2.8                                         | 3.3 to 4.5                                 |
| NC - CO == 0       | -9.0 to -5.6                             | 4.0 to 6.4         | -3.3 to -2.6                                         | 3.4 to 4.6                                 |
| NY - CO == 0       | -2.8 to 0.1                              | -0.8 to 1.3        | -0.4 to 0.2                                          | 0.4 to 1.4                                 |
| OST - CO == 0      | -10.9 to -7.4                            | 4.4 to 6.9         | -3.2 to -2.5                                         | 3.4 to 4.6                                 |
| NC - MO == 0       | -0.4 to 3.2                              | -0.5 to 2.1        | -0.2 to 0.6                                          | -0.6 to 0.7                                |
| NY - MO == 0       | 5.8 to 8.9                               | -5.3 to -3.1       | 2.7 to 3.4                                           | -3.6 to -2.4                               |
| OST - MO == 0      | -2.3 to 1.4                              | -0.1 to 2.5        | -0.2 to 0.6                                          | -0.6 to 0.7                                |
| NY - NC == 0       | 4.4 to 7.6                               | -6.1 to -3.8       | 2.5 to 3.2                                           | -3.7 to -2.5                               |
| OST - NC == 0      | -3.7 to 0.1                              | -1.0 to 1.8        | -0.4 to 0.4                                          | -0.7 to 0.7                                |
| OST - NY == 0      | -9.5 to -6.1                             | 4.2 to 6.6         | -3.2 to -2.5                                         | 2.4 to 3.7                                 |

\* The hypothesis is that the compared groups are the same (0). <sup>‡</sup> If the 95% CI includes 0 than the groups are defined as the same.

**Table S9. Grouping indicated by the ANOVA results.** CO samples represented one control group, NY samples represented another control group, and MO, NC, and OST samples comprised a third (STARI) group. CO, Colorado; NY, New York; MO, Missouri; NC, North Carolina; OST, other states from which STARI samples were collected; RF, Random Forest.

| Sample Source | LASSO Healthy Control scores | LASSO STARI scores | Healthy Control classification probabilities from RF | STARI classification probabilities from RF |
|---------------|------------------------------|--------------------|------------------------------------------------------|--------------------------------------------|
|               | Group <sup>†</sup>           |                    |                                                      |                                            |
| CO            | A                            | A                  | A                                                    | A                                          |
| MO            | B                            | B                  | B                                                    | B                                          |
| NY            | A                            | A                  | A                                                    | C*                                         |
| NC            | B                            | B                  | B                                                    | B                                          |
| OST           | B                            | B                  | B                                                    | B                                          |

<sup>†</sup> Groups within each analysis were assigned a letter: A, B or C. \*The NY healthy control samples differed from both the healthy controls from CO and from the STARI samples from MO, NC and OST when STARI classification probabilities from RF were evaluated.
